# Supplementary material for: Phage tailspike modularity and horizontal gene transfer reveals specificity towards E. coli O-antigen serogroups
Source: Springer Nature journal article supplement (doi:10.1186/s12985-023-02138-4), 2023-08-07
Supplement: MOESM3 [file 25895768]

## Additional file 3

Similarity matrices of the RBP and its domains after MUSCLE multiple sequence alignment.

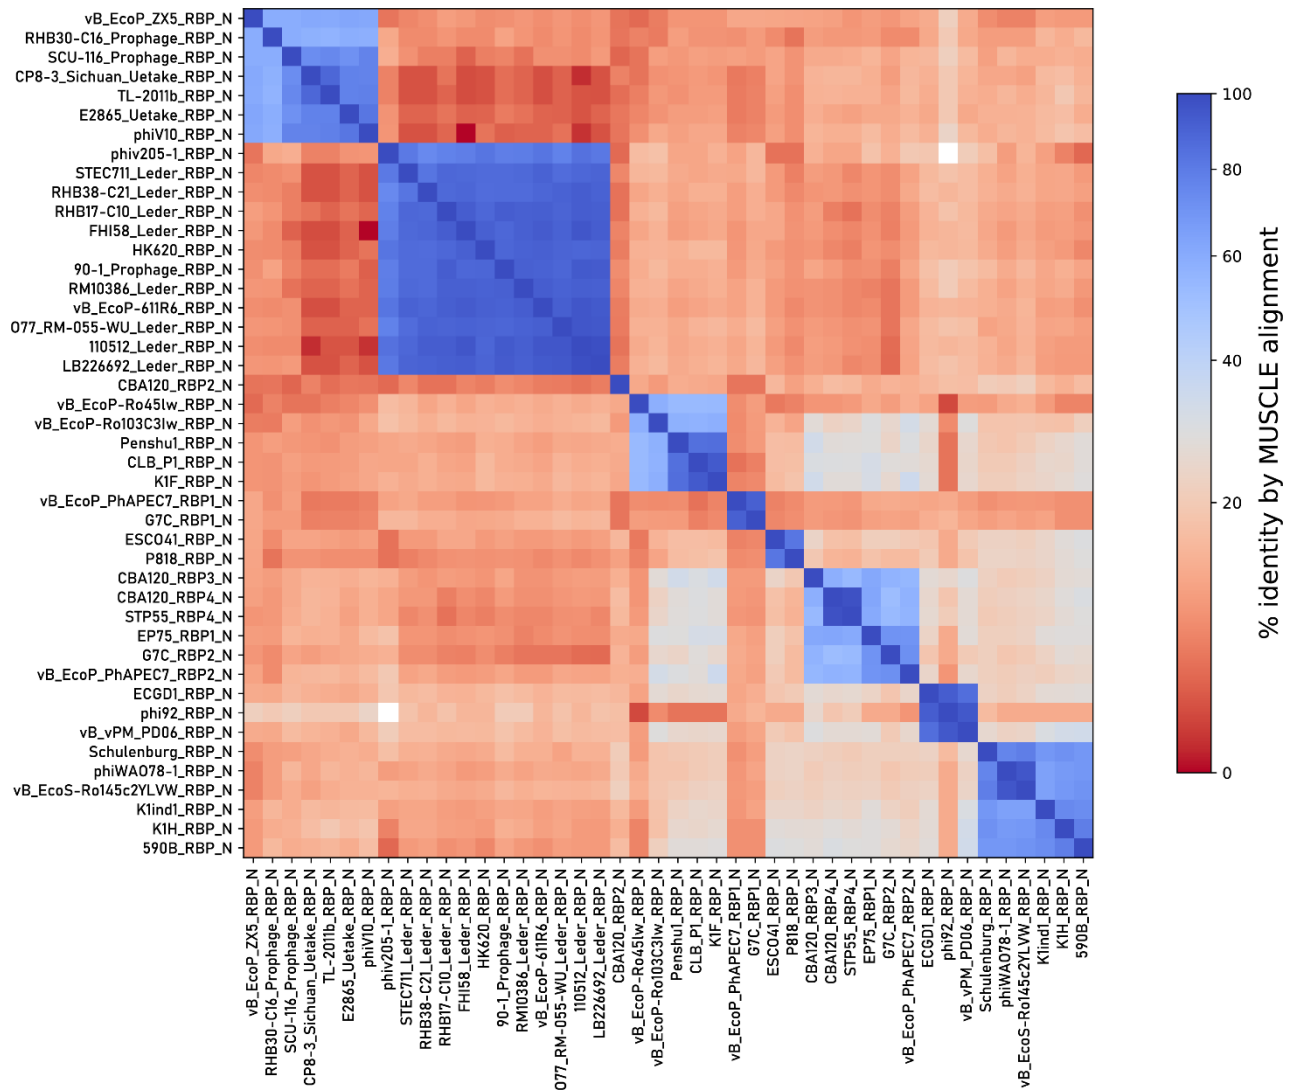

**Figure S1: Similarity matrix of the RBP anchor domains after MUSCLE multiple sequence alignment.**

The % aa identity between all delineated anchor amino acid sequences is visualized. Clustering corresponds to the branching of the phylogenetic tree of the RBP anchor domains (**Figure 5, b**).

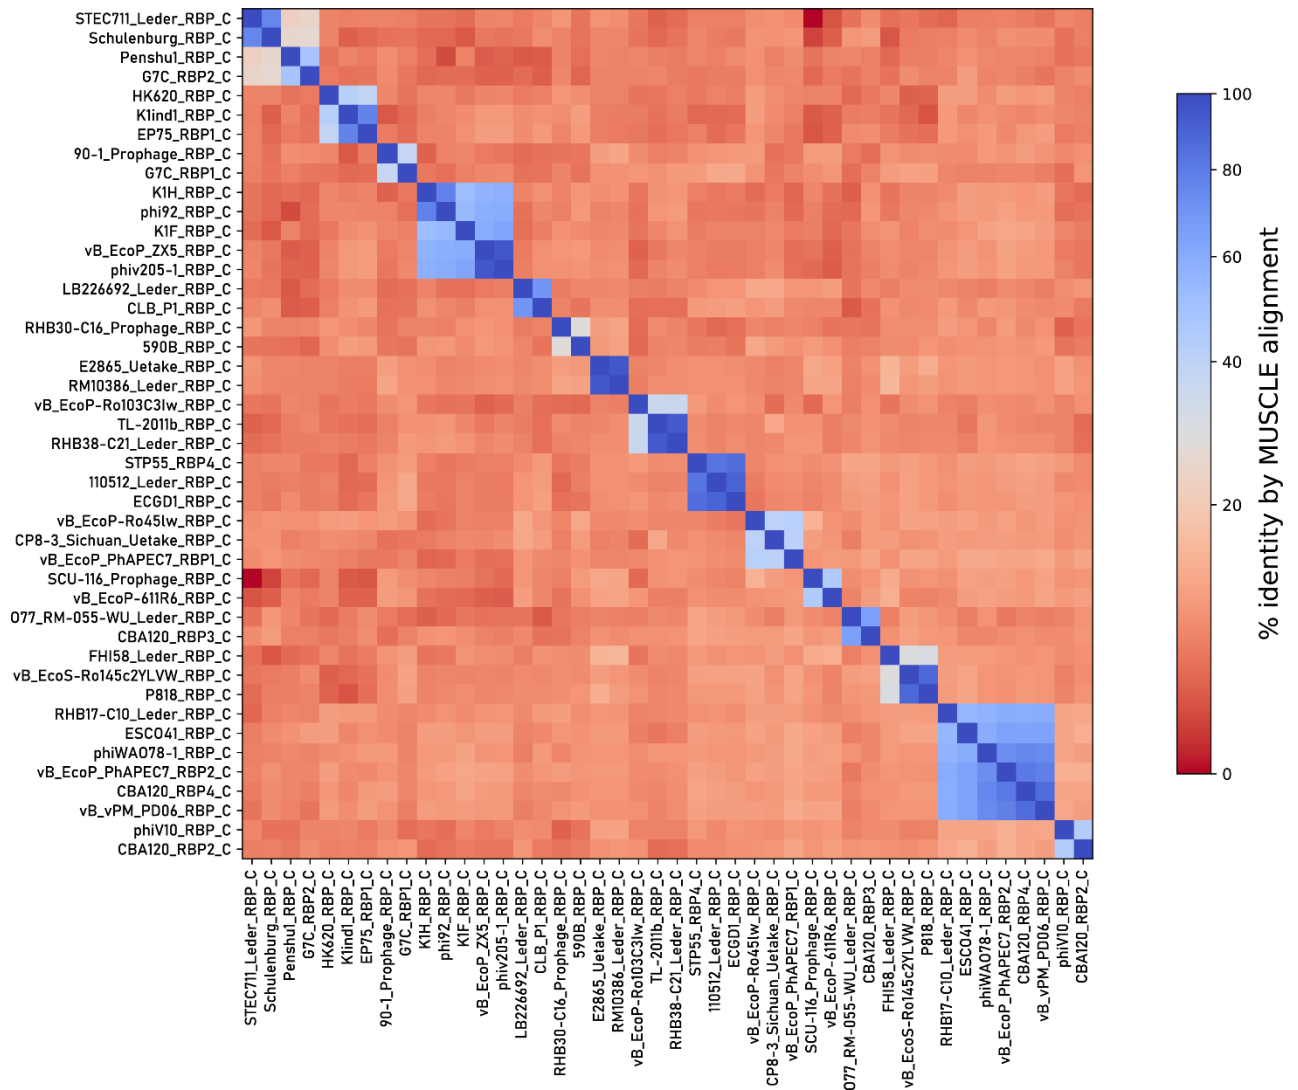

**Figure S2: Similarity matrix of the RBP RBDs after MUSCLE multiple sequence alignment.** The % aa identity between all delineated RBD amino acid sequences is visualized. Clustering corresponds to the branching of the phylogenetic tree of the RBDs (Figure 5, c).

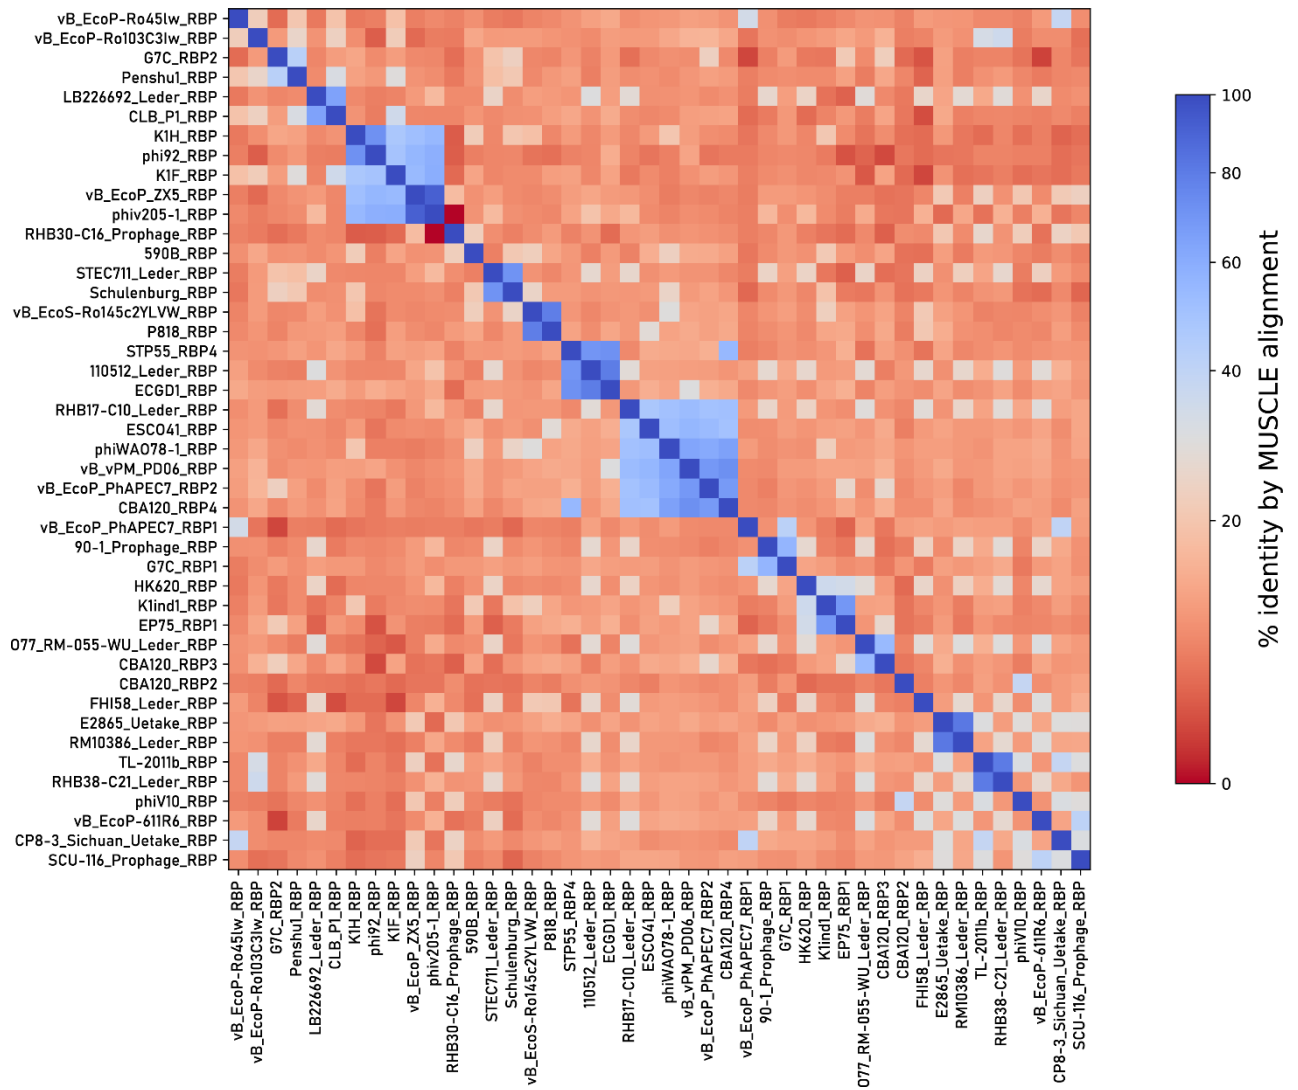

**Figure S3: Similarity matrix of the complete RBPs after MUSCLE multiple sequence alignment.** The % aa identity between all RBP amino acid sequences is visualized. Similarity matches correspond to the branching of the phylogenetic tree of the RBP coding sequences (**Figure 5, d**).
