# Supplementary material for: Phage tailspike modularity and horizontal gene transfer reveals specificity towards E. coli O-antigen serogroups
Source: Springer Nature journal article supplement (doi:10.1186/s12985-023-02138-4), 2023-08-07
Supplement: MOESM4 [file 25895768]

Name: 611R6\_RBP

Subtype target serogroup: 02

Genus: Lederbergvirus

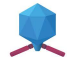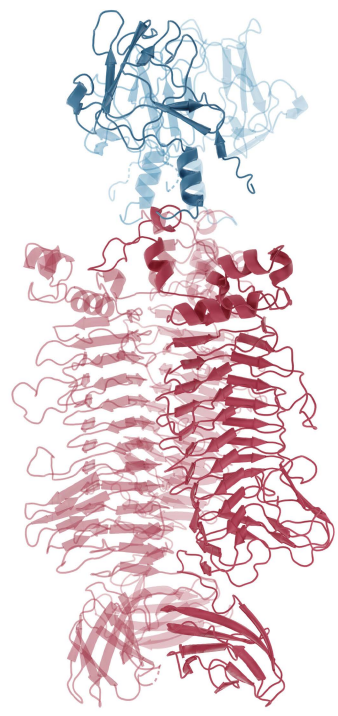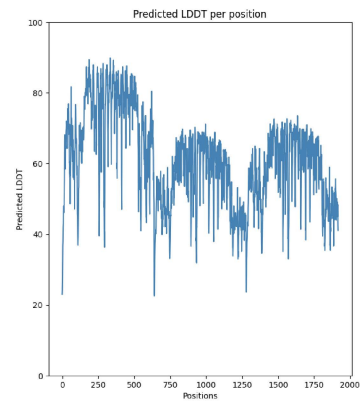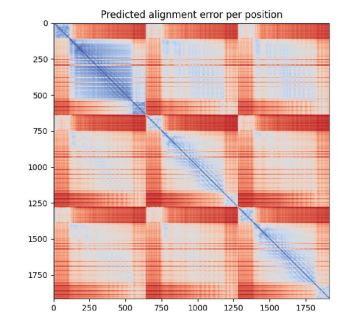

a. b. c.

Subtype target serogroup: 02

Genus: Uetakevirus

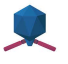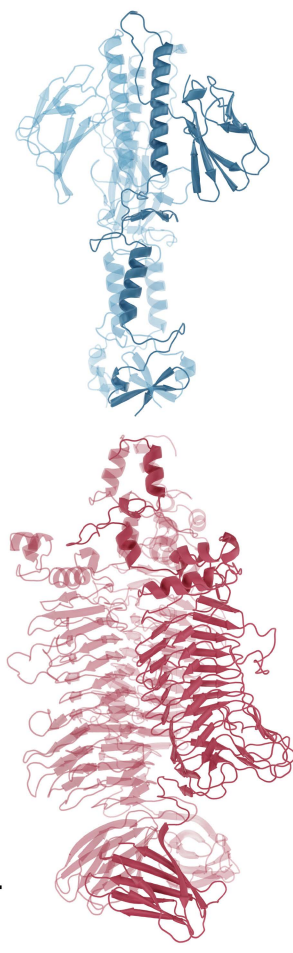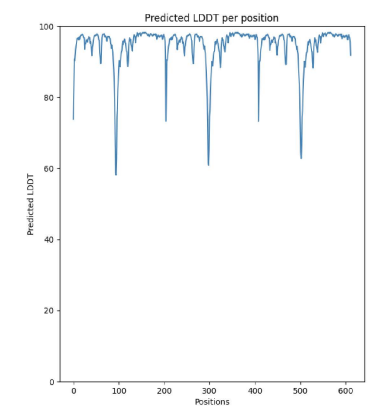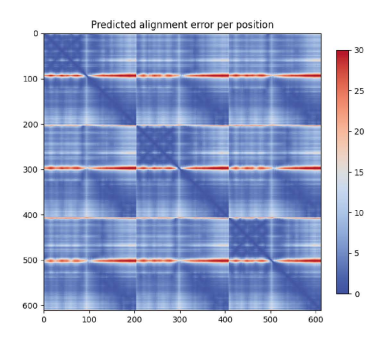

a. b. c.

Name: 90-1\_Prophage\_RBP

Subtype target serogroup: 08

Genus: Lederbergvirus

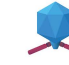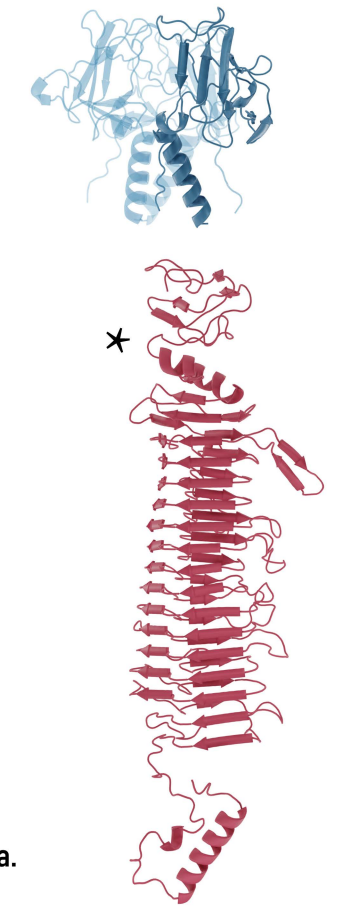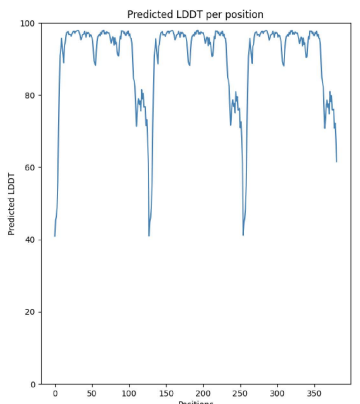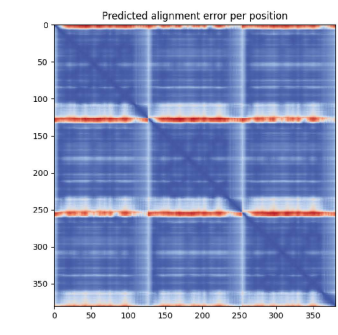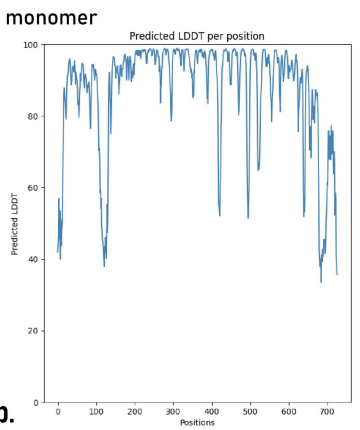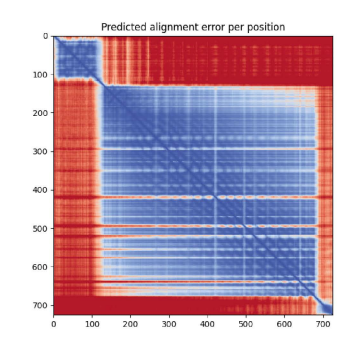

a. b. c.

Subtype target serogroup: 08

Genus: Gamaleyavirus

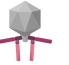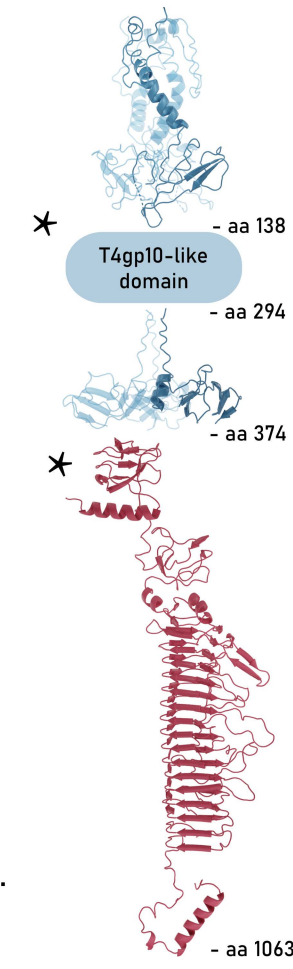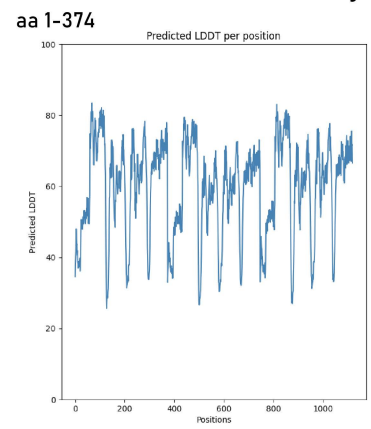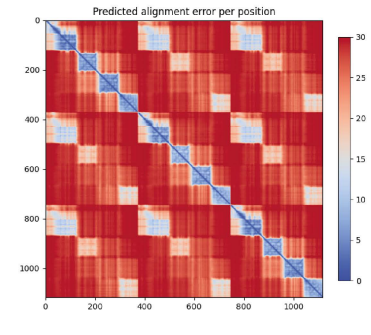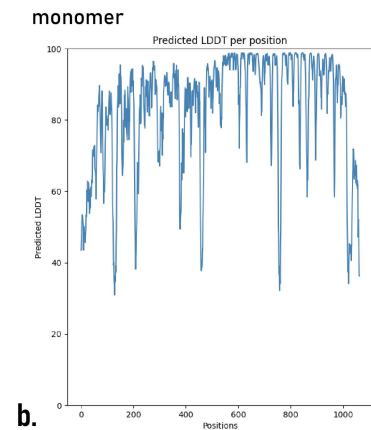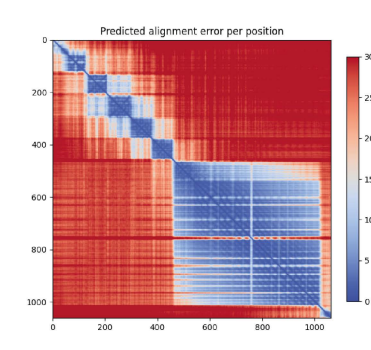

a. b. c.

Name: 590B\_RBP

Subtype target serogroup: 016

Genus: Kagunavirus

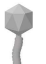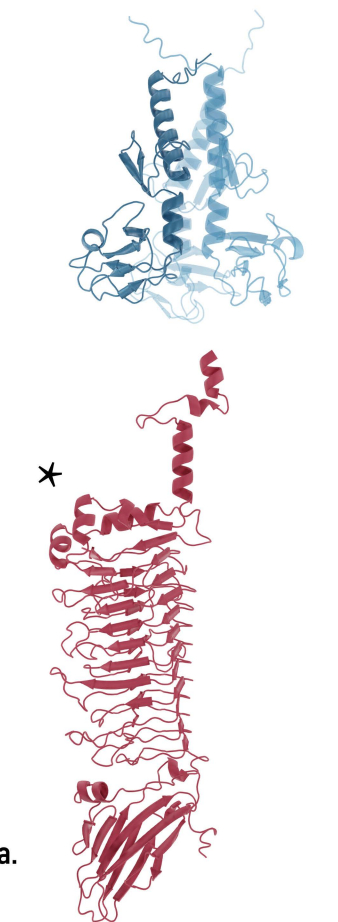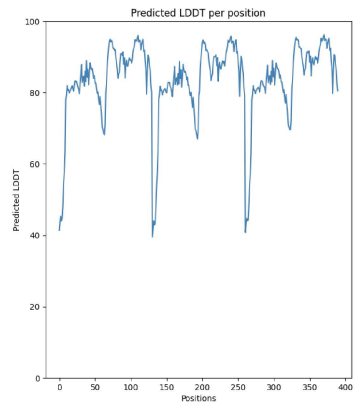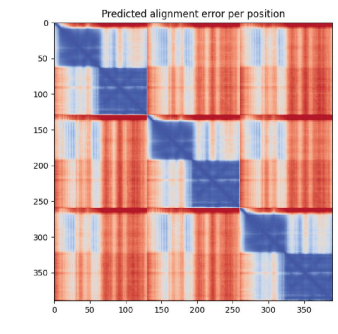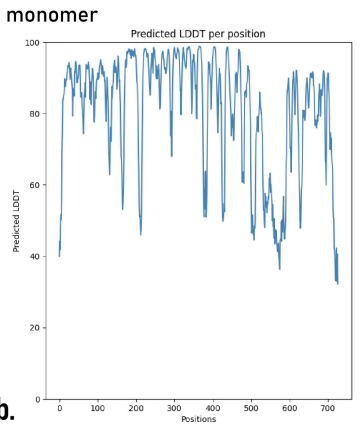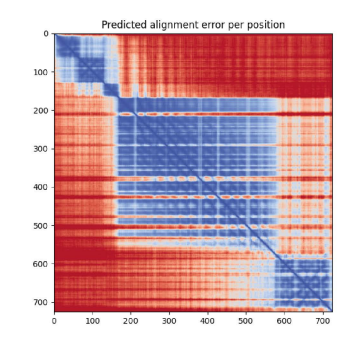

a. b. c.

Subtype target serogroup: 016

Genus: Uetakevirus

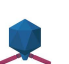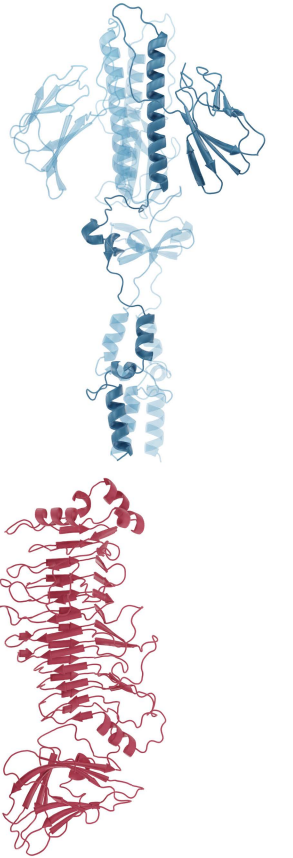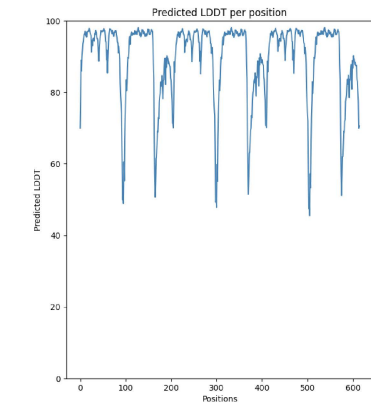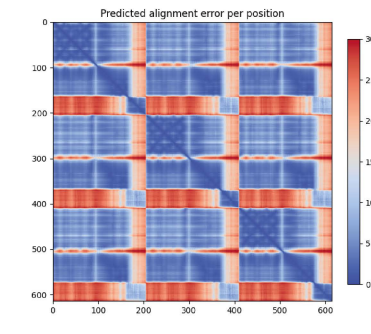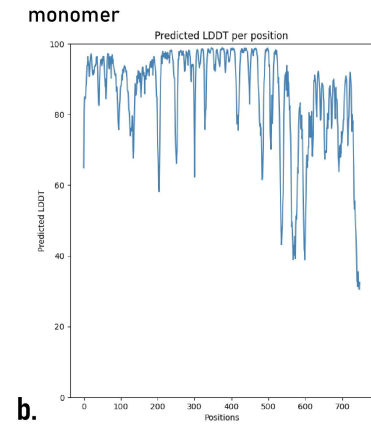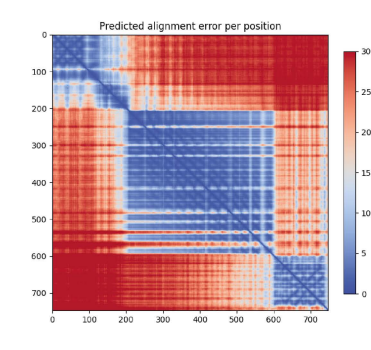

a. b. c.



Name: EP75\_RBP1

Subtype target serogroup: 018

Genus: *Kuttervirus*

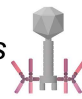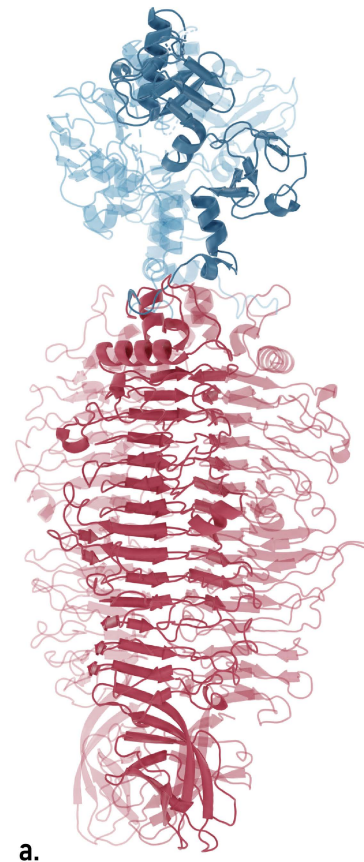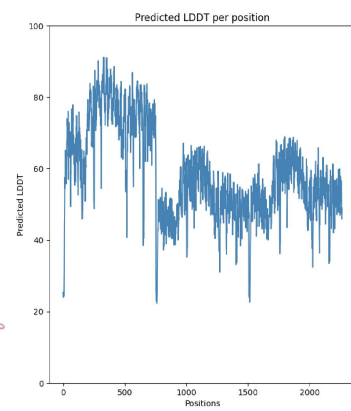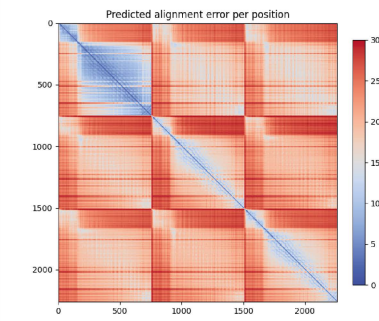

Subtype target serogroup: 018

Genus: *Lederbergvirus*

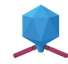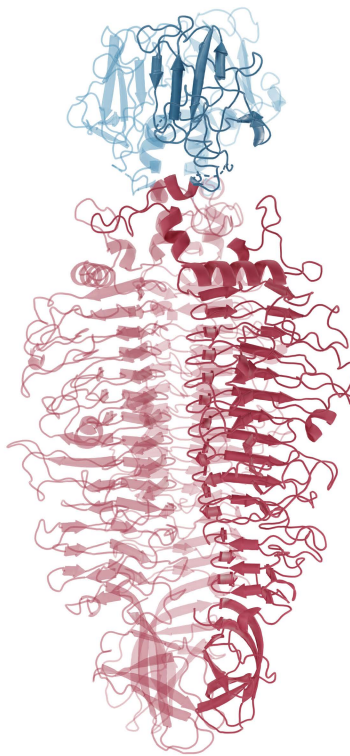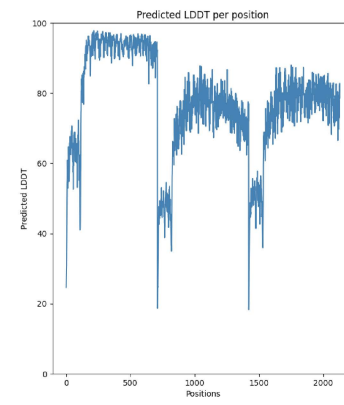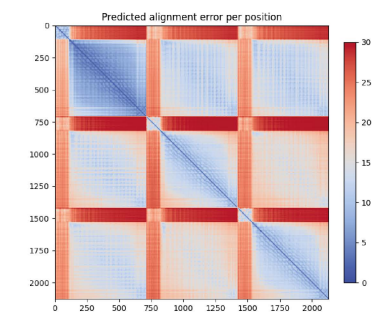

Name: Klind1\_RBP

Subtype target serogroup: 018

Genus: *Kagunavirus*

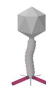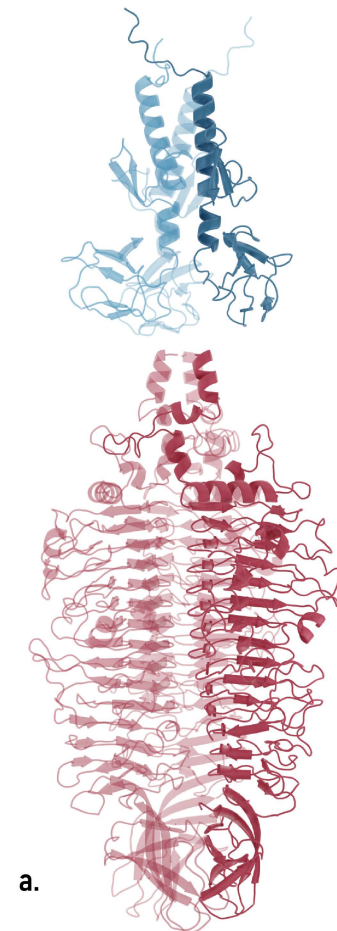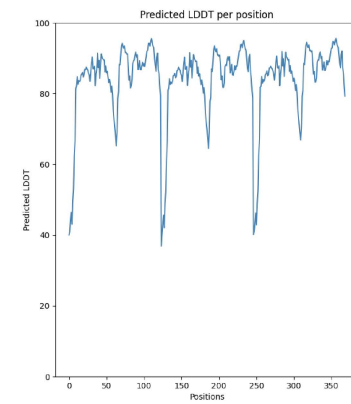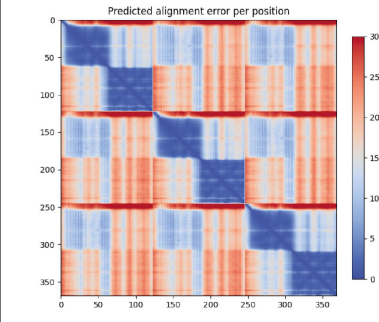

Name: CP8-3\_Sichuan\_Prophage\_RBP

Subtype target serogroup: 045

Genus: *Uetakevirus*

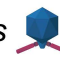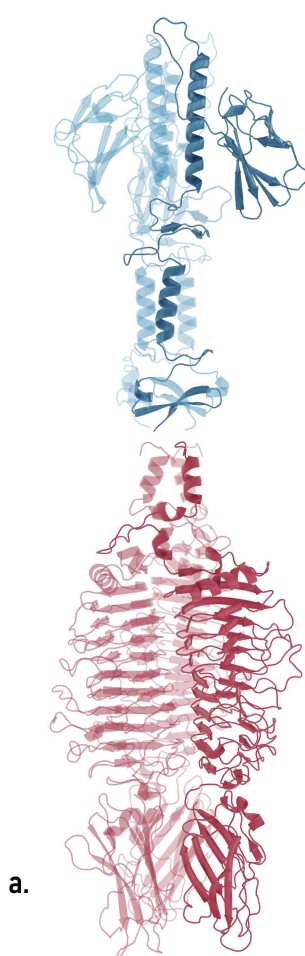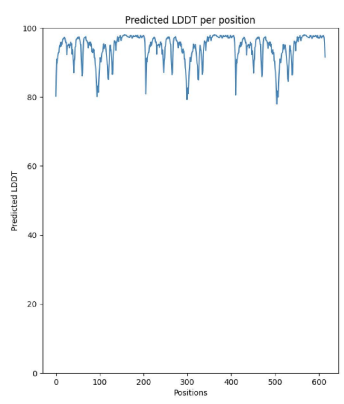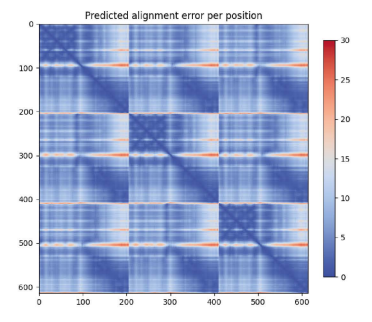

Name: Phapec7\_RBP1

Subtype target serogroup: 045

Genus: *Gamaleyavirus*

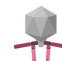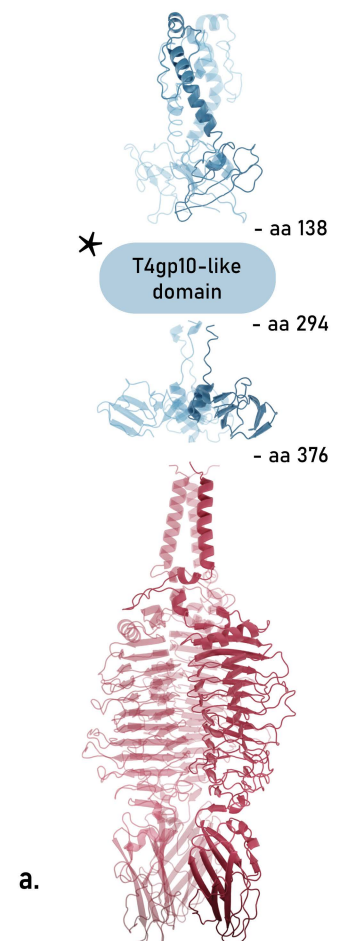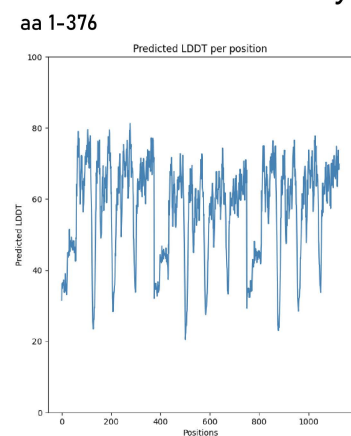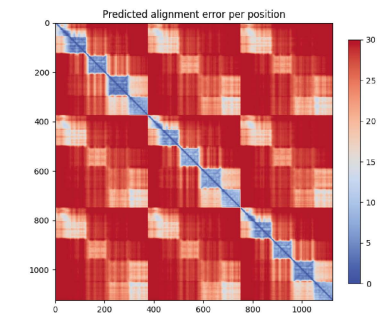

Name: Ro45lw\_RBP

Subtype target serogroup: 045

Genus: *Kayfunavirus*

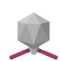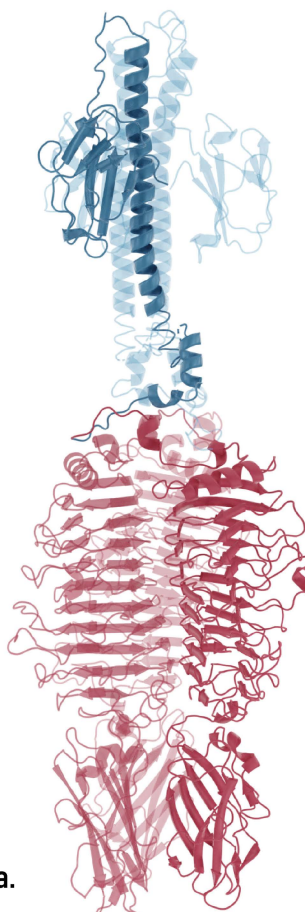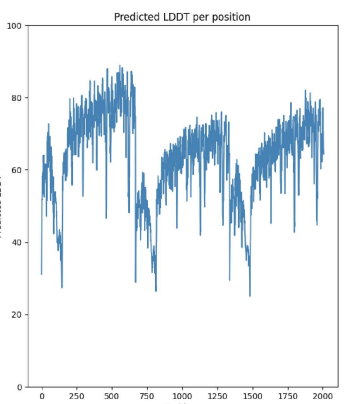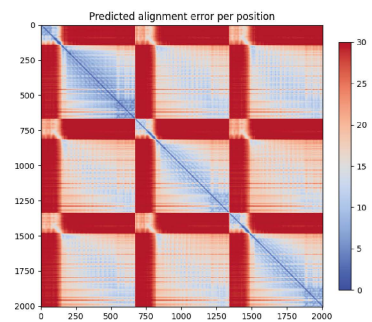



Name: E2865\_Prophage\_RBP

Subtype target serogroup: 026

Genus: Uetakevirus

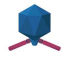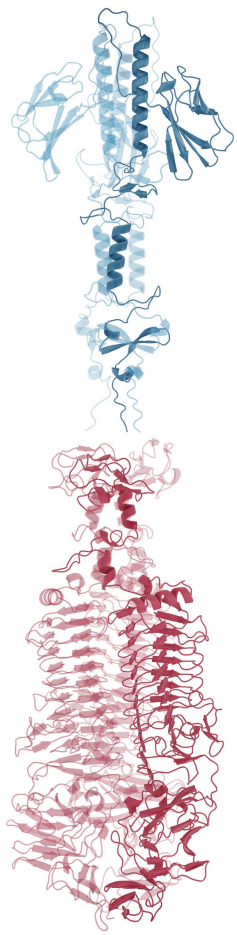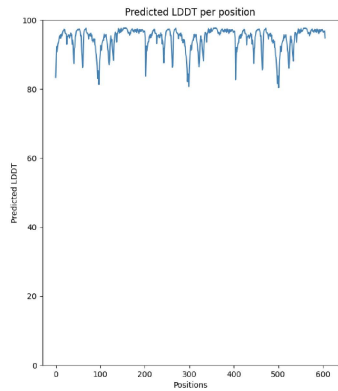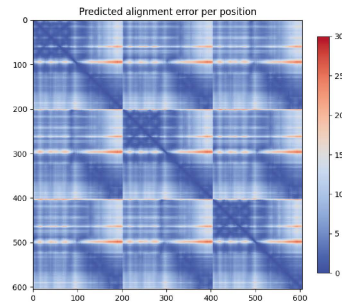

b.

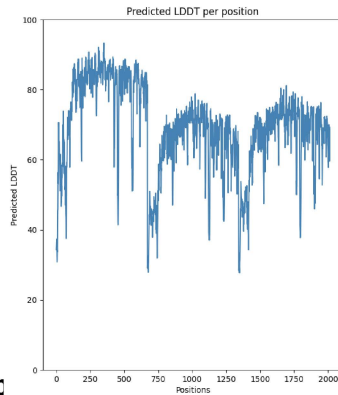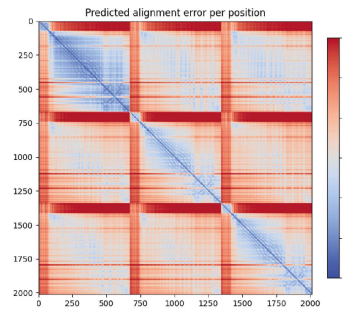

a.

Name: RM10386\_Prophage\_RBP

Subtype target serogroup: 026

Genus: Lederbergvirus

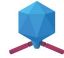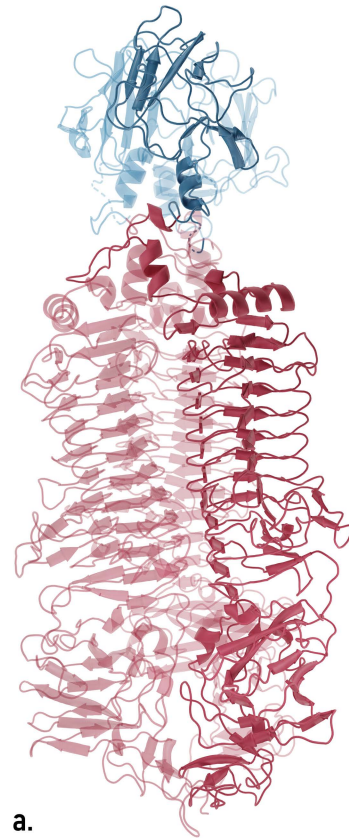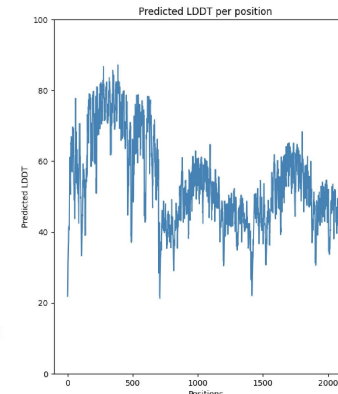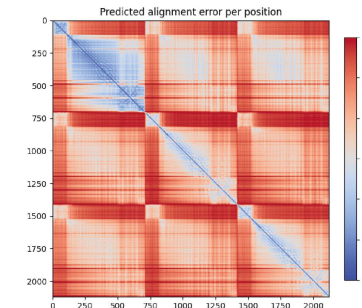

b.

c.

Name: CBA120\_RBP3

Subtype target serogroup: 077

Genus: Kuttervirus

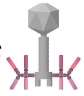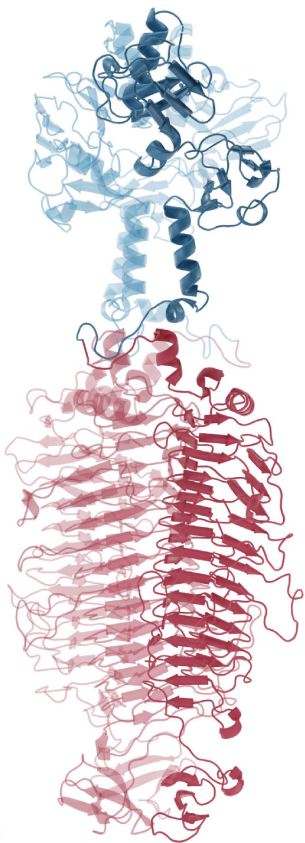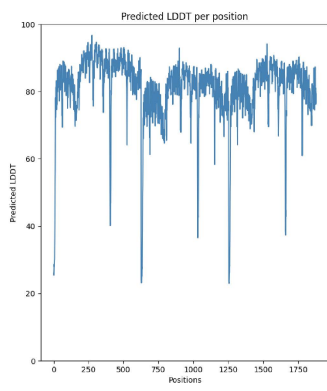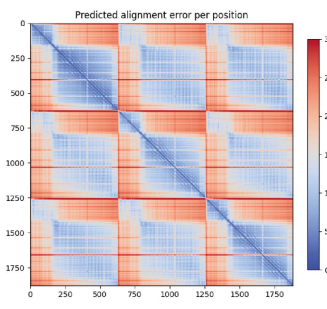

b.

c.

Name: RM-055-WU\_Prophage\_RBP

Subtype target serogroup: 077

Genus: Lederbergvirus

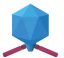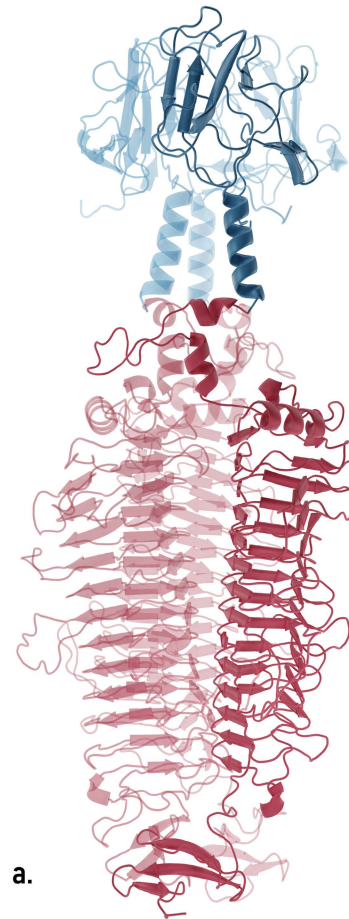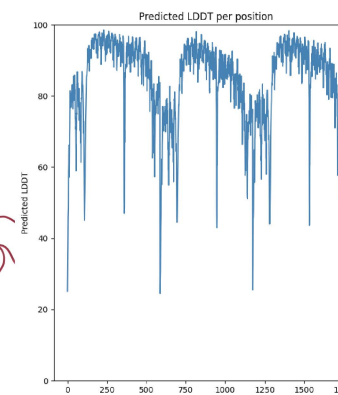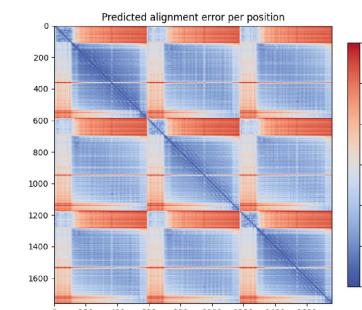

b.

c.

a.

a.



Name: CBA120\_RBP4

Subtype target serogroup: 078

Genus: *Kuttervirus*

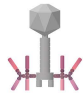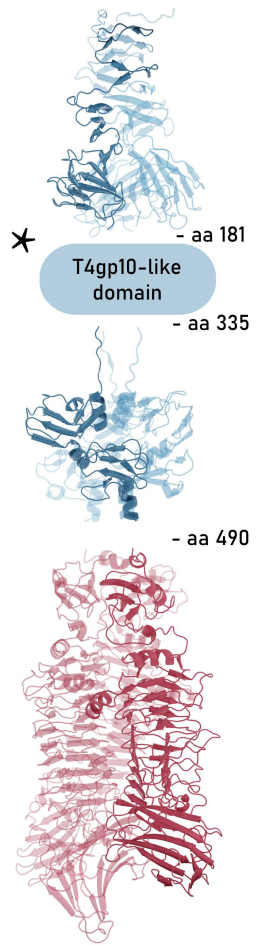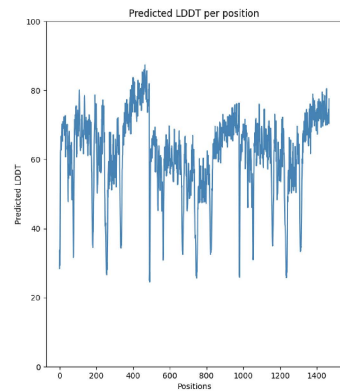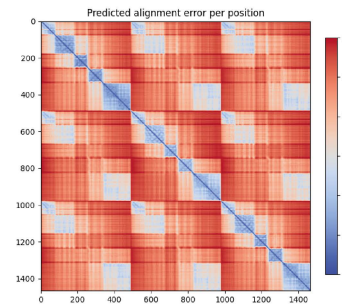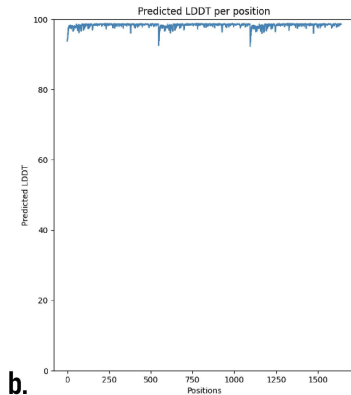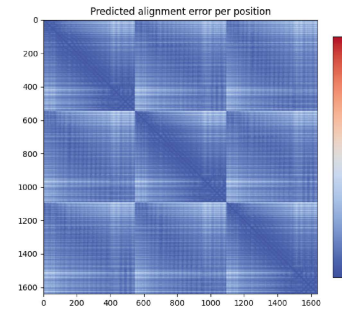

Name: PD06\_RBP

Subtype target serogroup: 078

Genus: *Justusliebivirus*

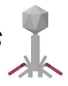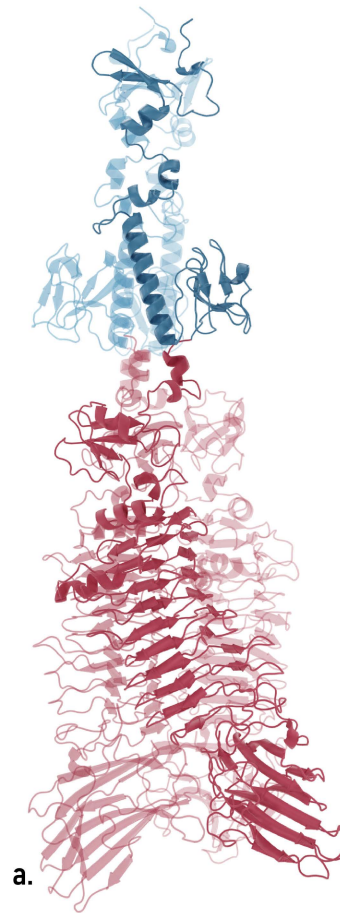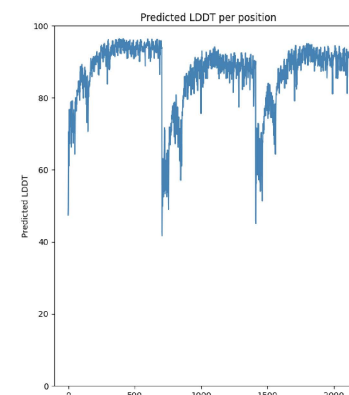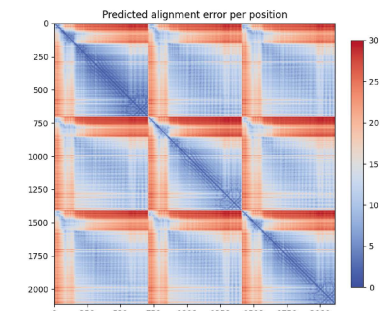

a. b. c.

Name: Phapec7\_RBP2

Subtype target serogroup: 078

Genus: *Gamaleyavirus*

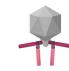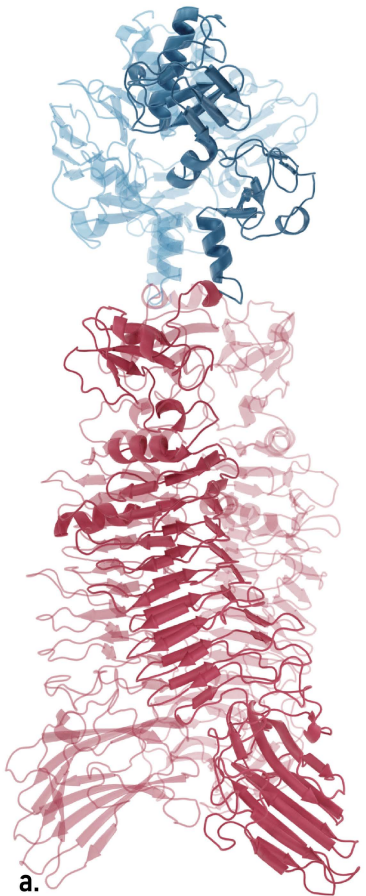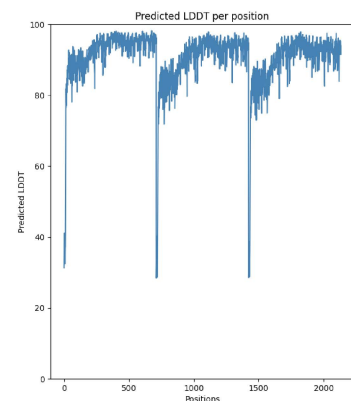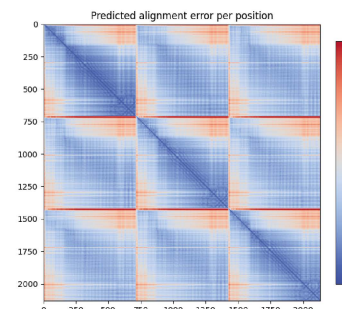

a. b. c.

Name: phiWA078-1\_RBP

Subtype target serogroup: 078

Genus: *Kagunavirus*

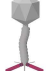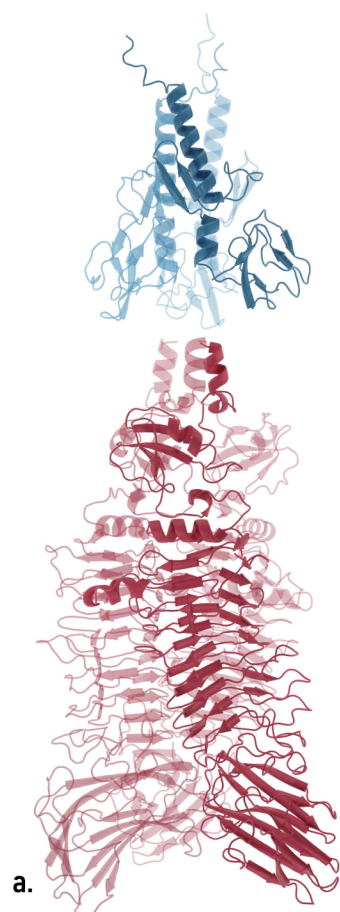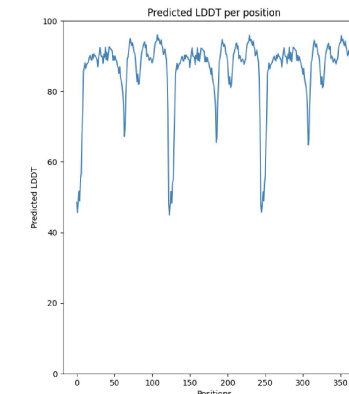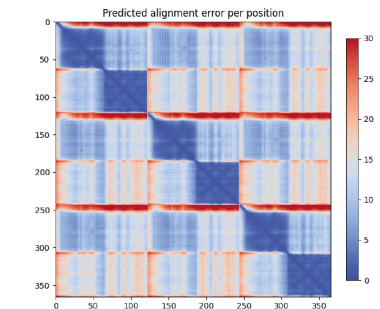

a. b. c.

Name: RHB17-C10\_Prophage\_RBP

Subtype target serogroup: 078

Genus: *Lederbergvirus*

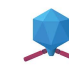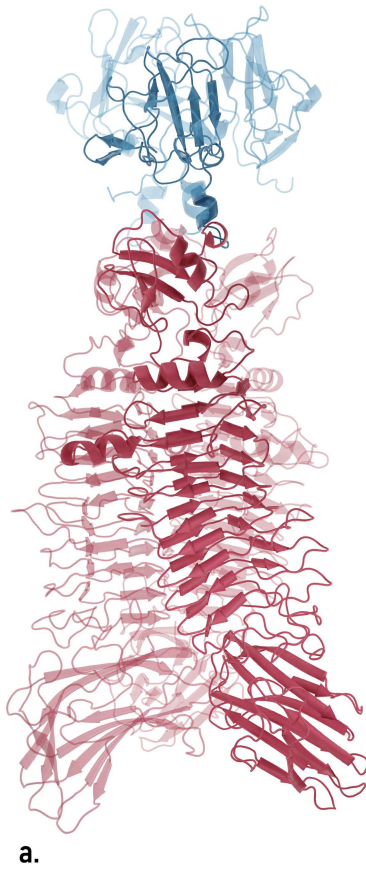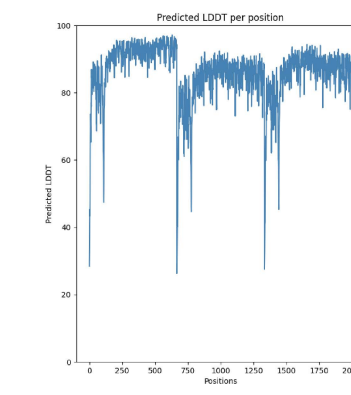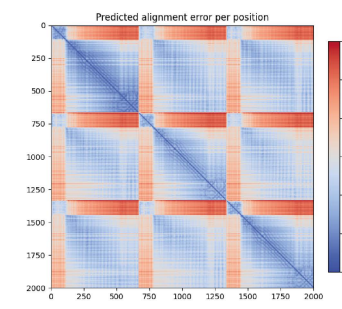

a. b. c.

Name: ESC041\_RBP

Subtype target serogroup: 078

Genus: *Nouzillyvirus*

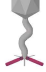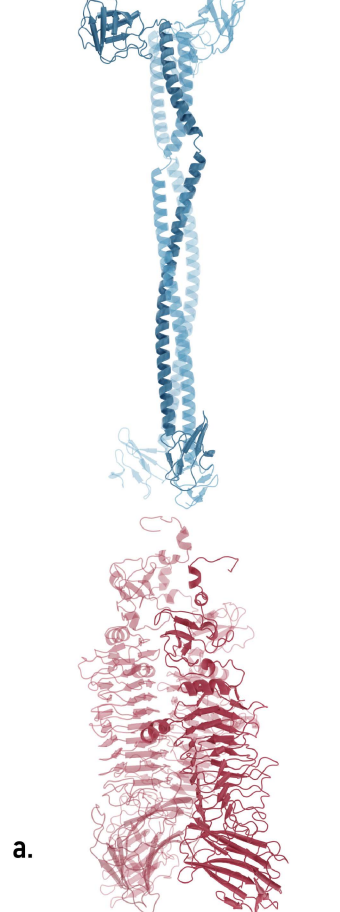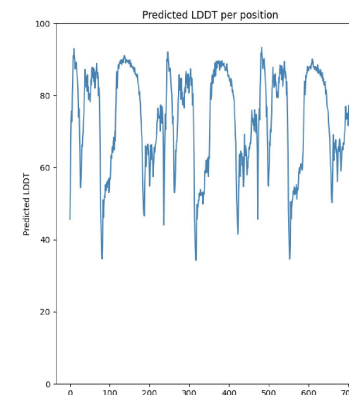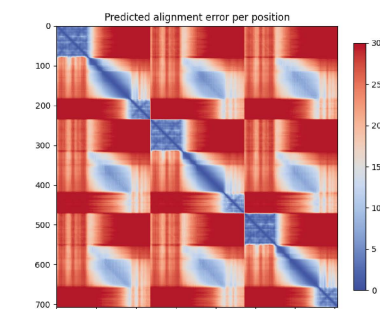

a. b. c.



Name: RHB38-C21\_Prophage\_RBP

Subtype target serogroup: 0103

Genus: Lederbergvirus

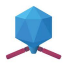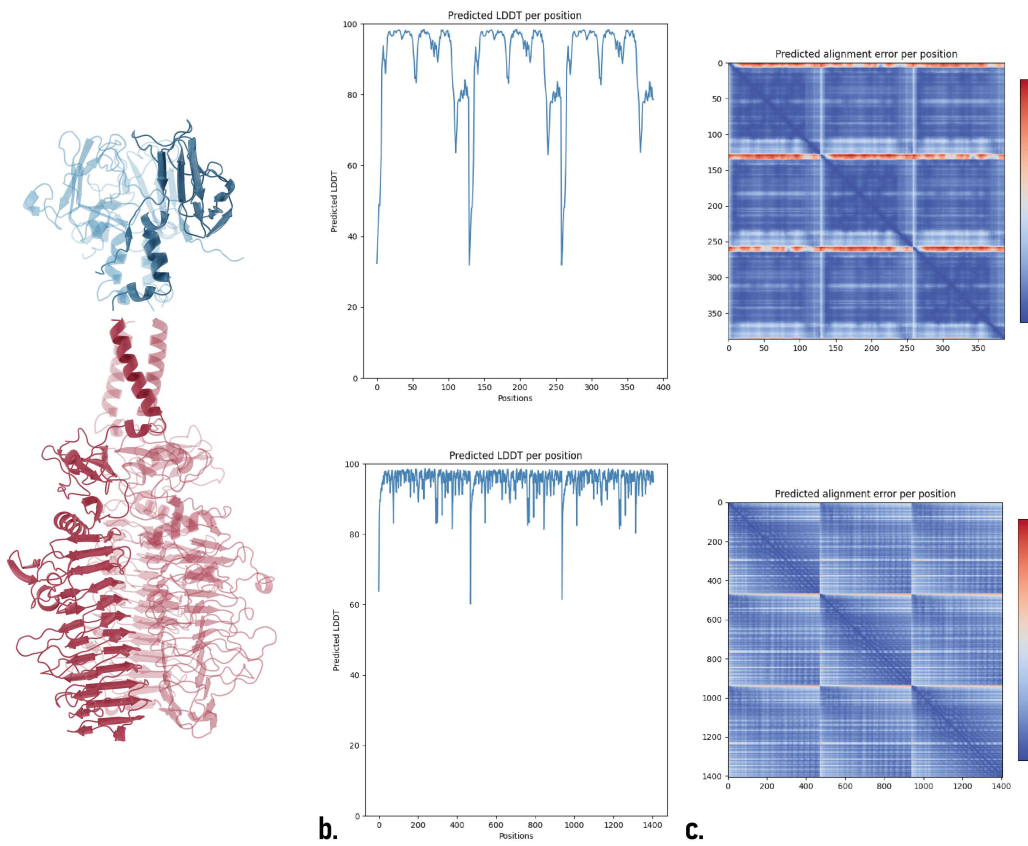

Subtype target serogroup: 0103

Genus: Kayfunavirus

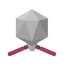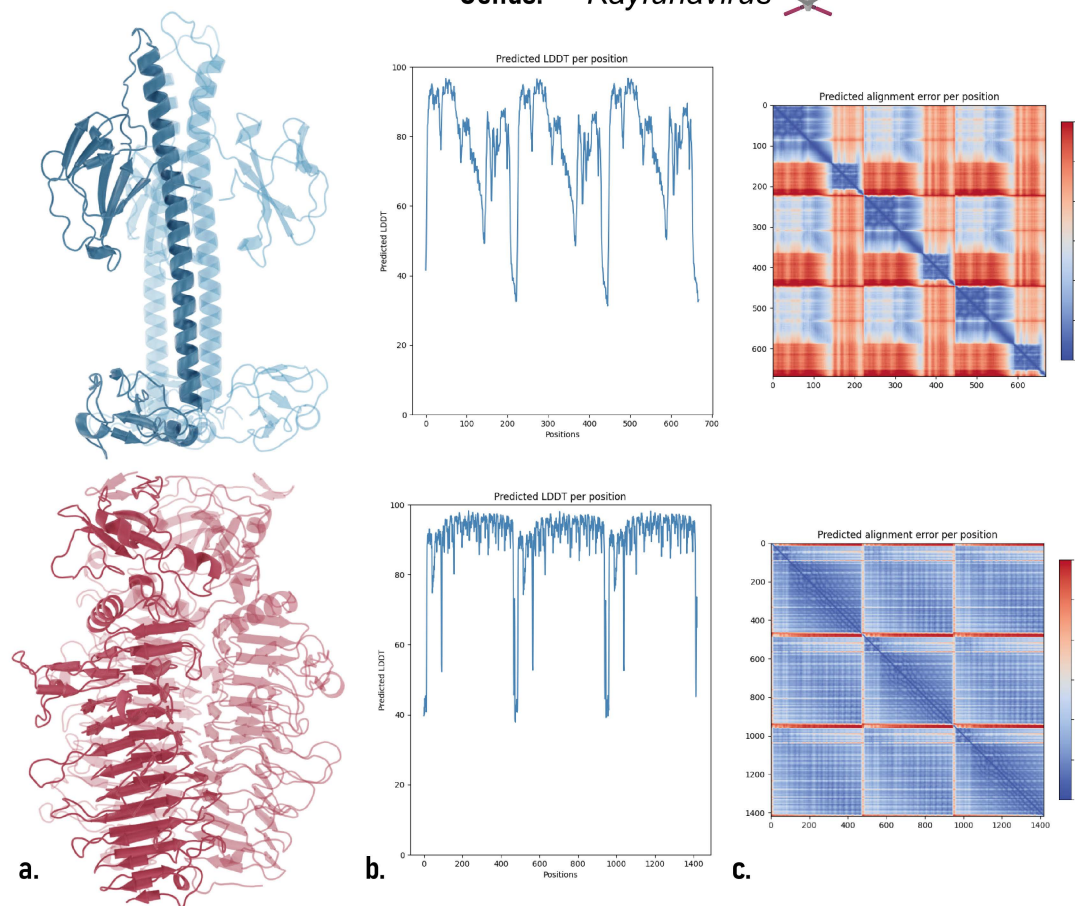

Name: TL-2011b\_RBP

Subtype target serogroup: 0103

Genus: Uetakevirus

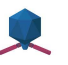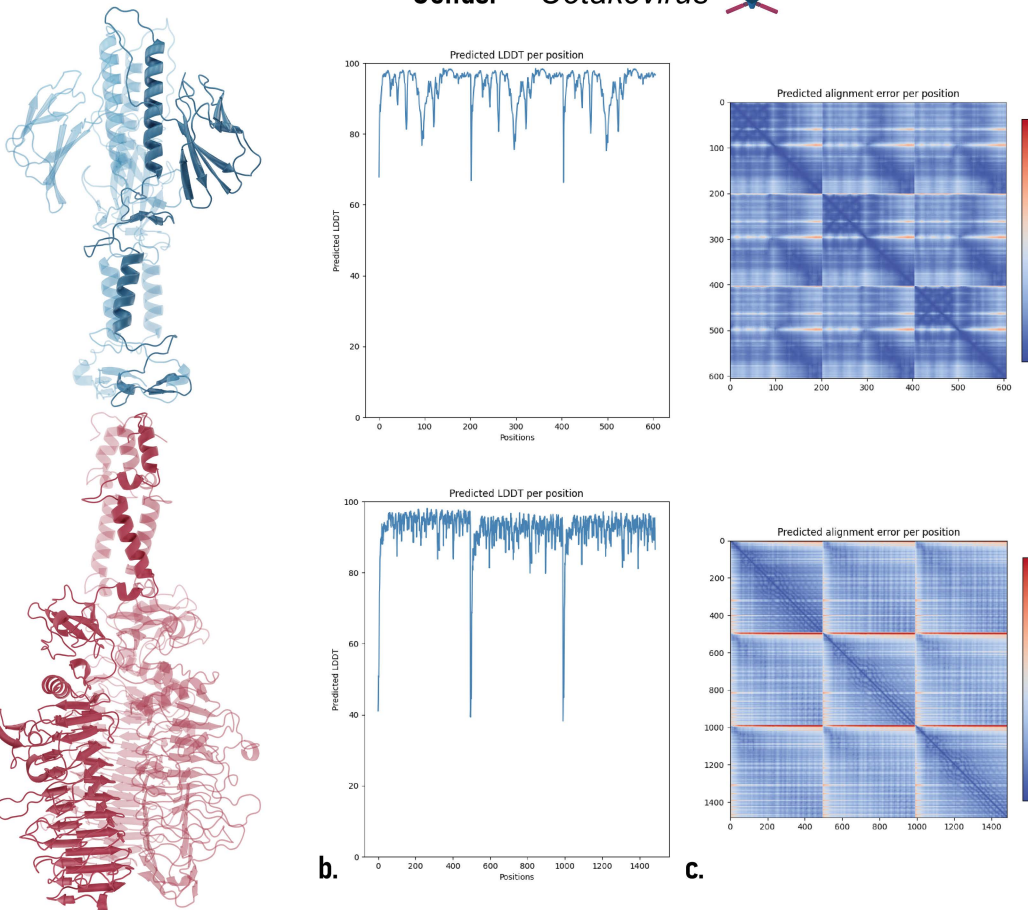

Name: 110512\_RBP

Subtype target serogroup: 0111

Genus: Lederbergvirus

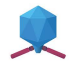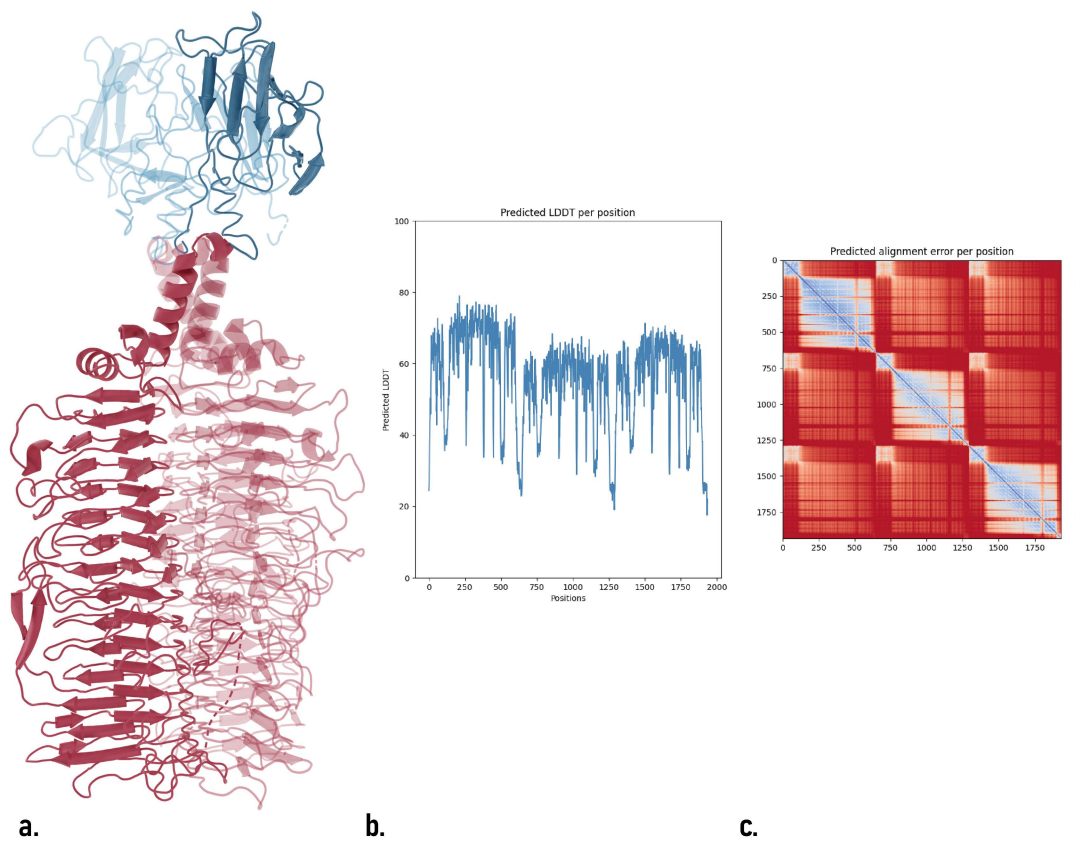

Name: ECGD1\_RBP

Subtype target serogroup: 0111

Genus: Justusliebigvirus

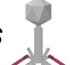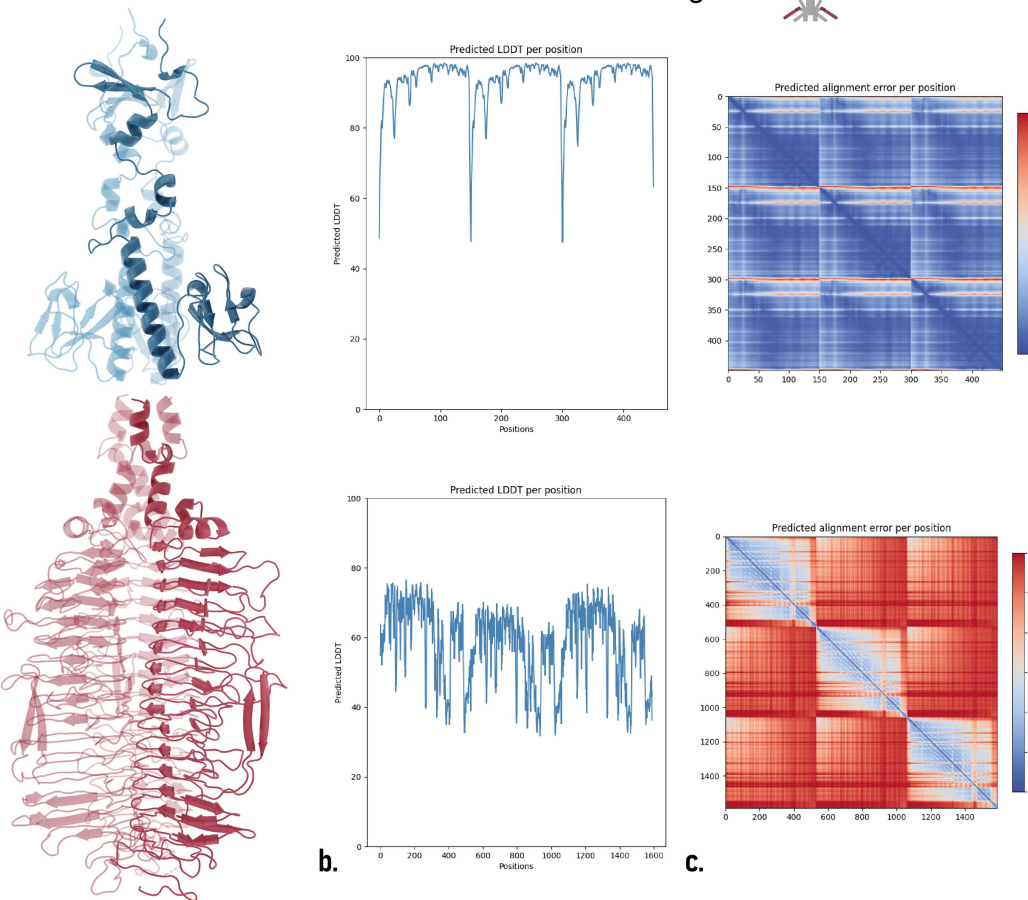

Name: STP55\_RBP4

Subtype target serogroup: 0111

Genus: Kuttervirus

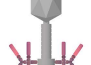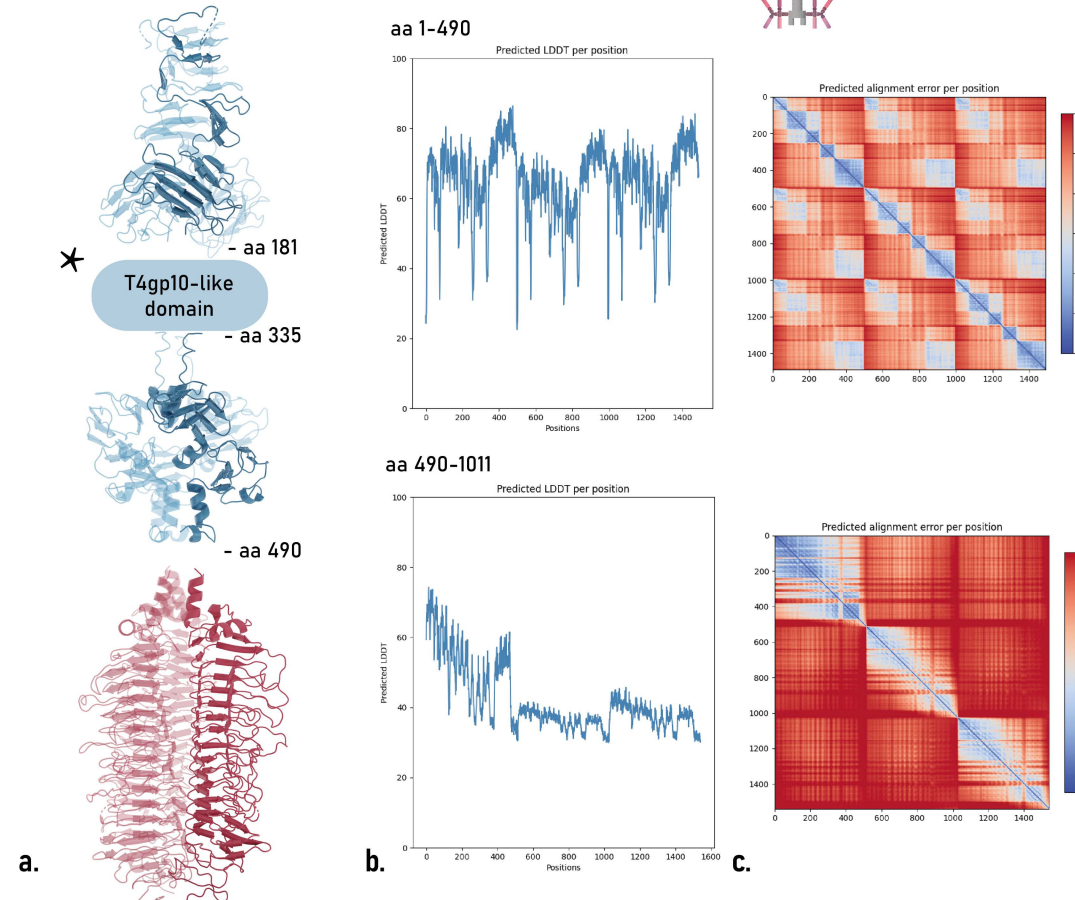



Name: CLB-P1\_RBP

Subtype target serogroup: 0104

Genus: *Kayfunavirus*

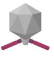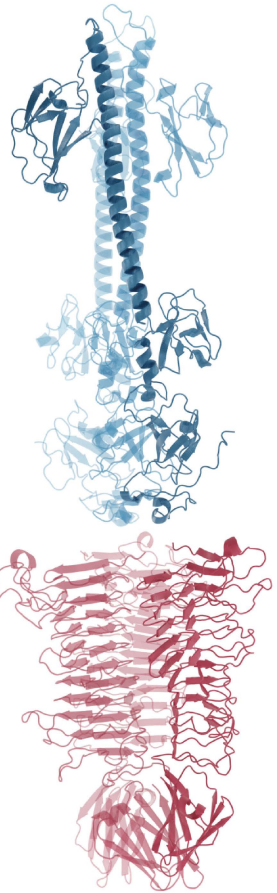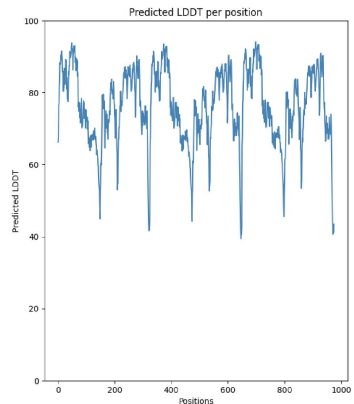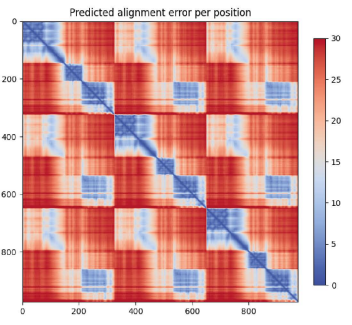

Name: LB22692\_Prophage\_RBP

Subtype target serogroup: 0104

Genus: *Lederbergvirus*

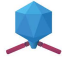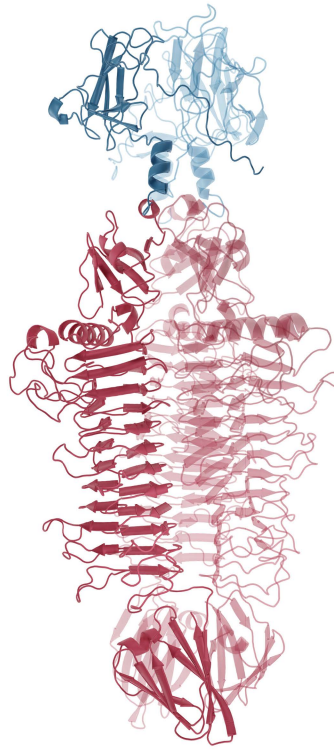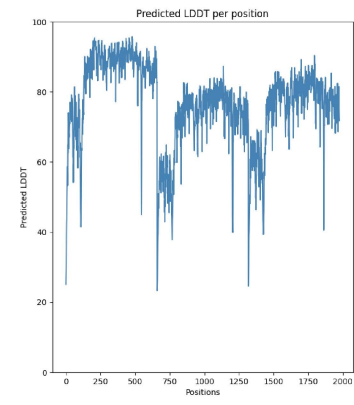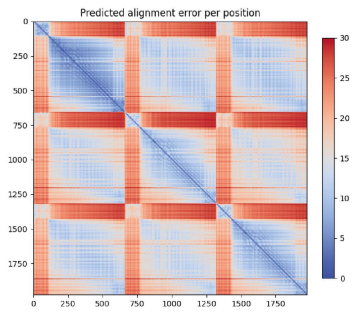

Name: FHI58\_Prophage\_RBP

Subtype target serogroup: 0145

Genus: *Lederbergvirus*

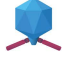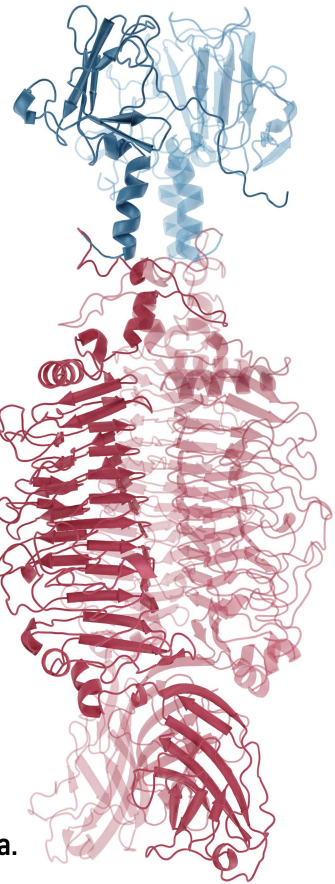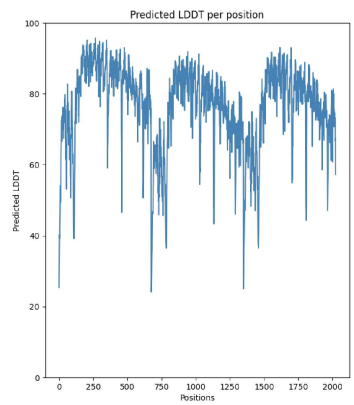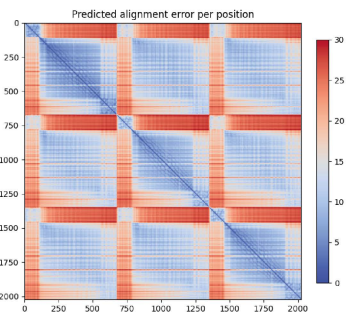

Name: Ro145c2YLVW\_RBP

Subtype target serogroup: 0145

Genus: *Kagunavirus*

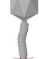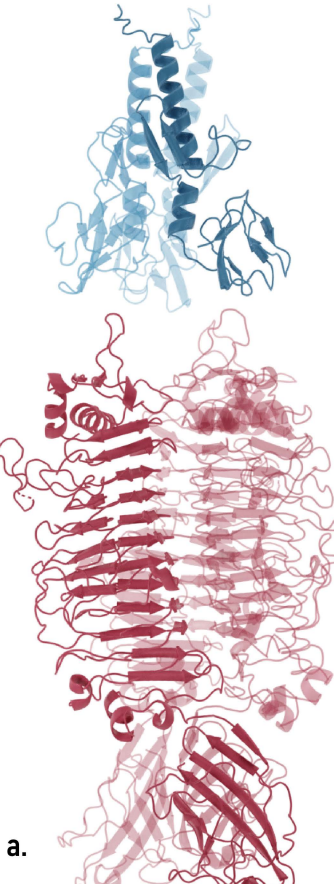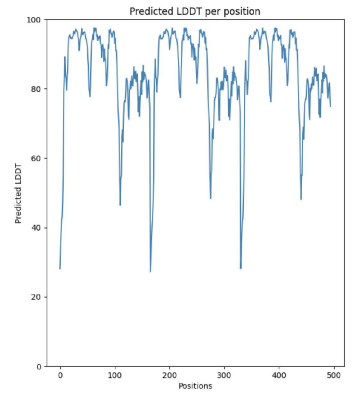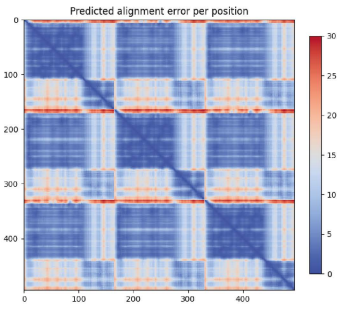

Name: P818\_RBP

Subtype target serogroup: 0145

Genus: *Nouzillyvirus*

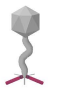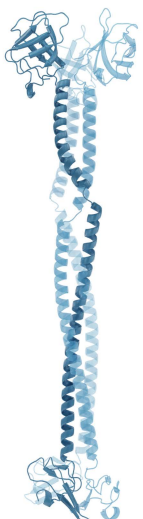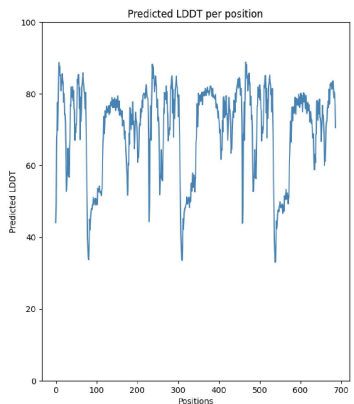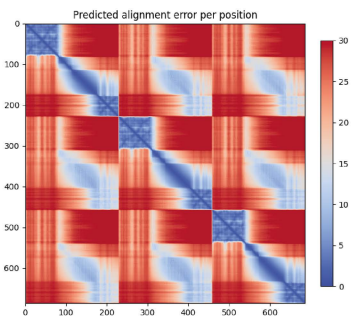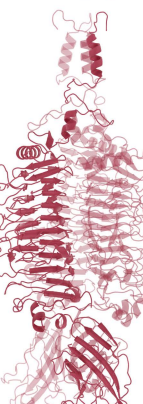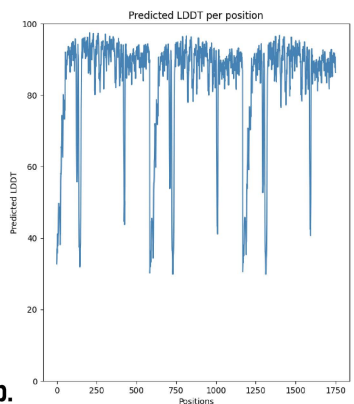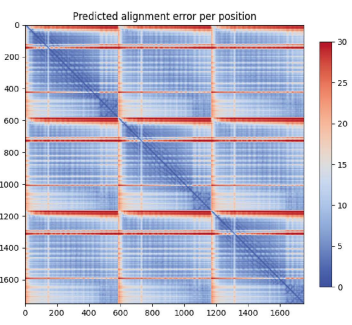



Name: **CBA120\_RBP2**

Subtype target serogroup: **0157**

Genus: *Kuttervirus*

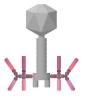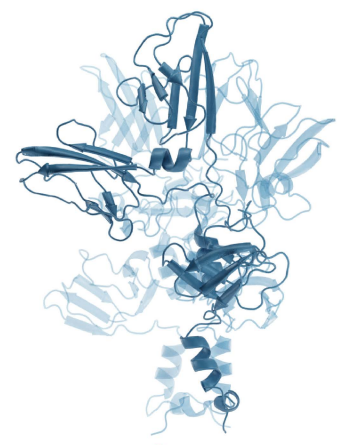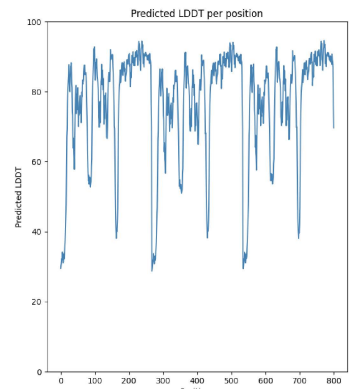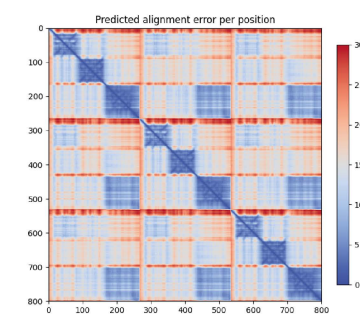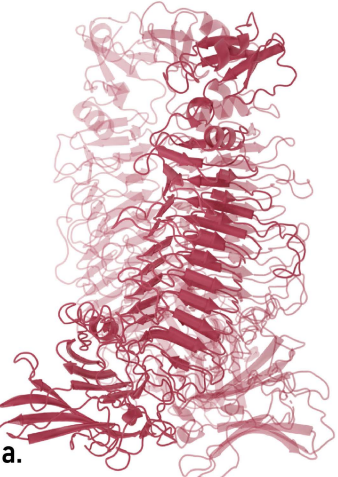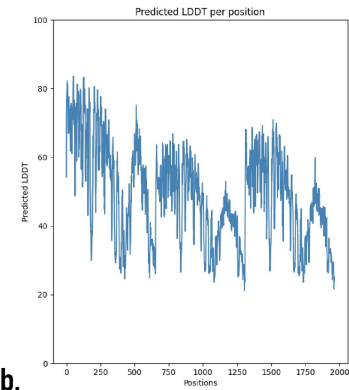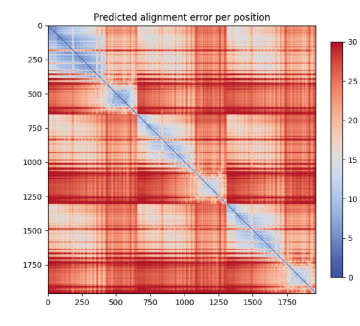

a.

b.

c.

Name: **phiV10\_RBP**

Subtype target serogroup: **0157**

Genus: *Uetakevirus*

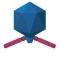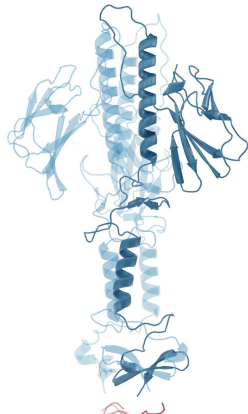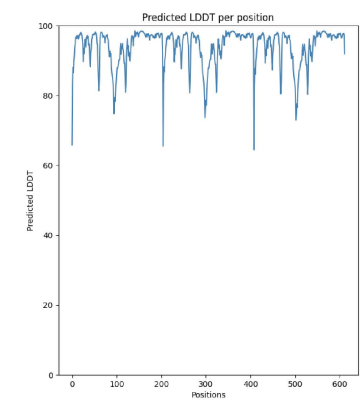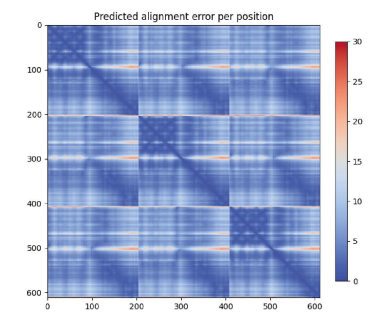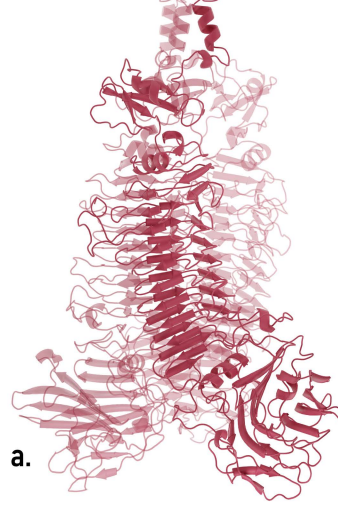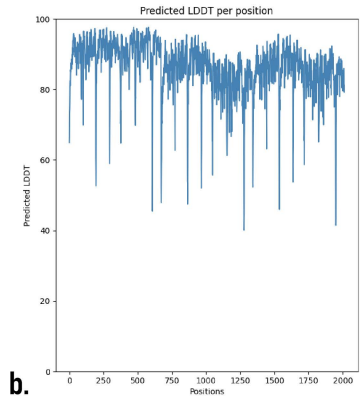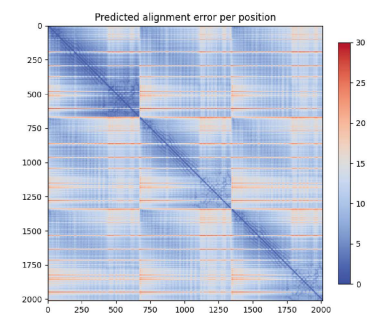

a.

b.

c.

Name: **G7C\_RBP2**

Subtype target serogroup: **4s**

Genus: *Gamaleyavirus*

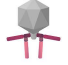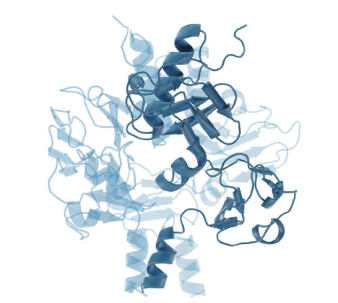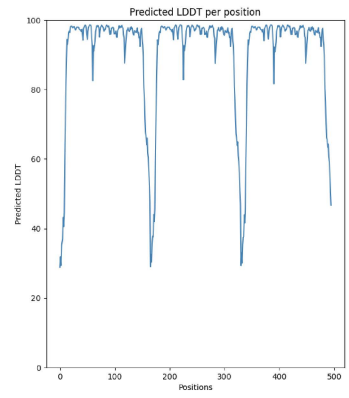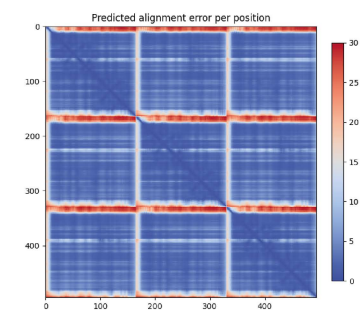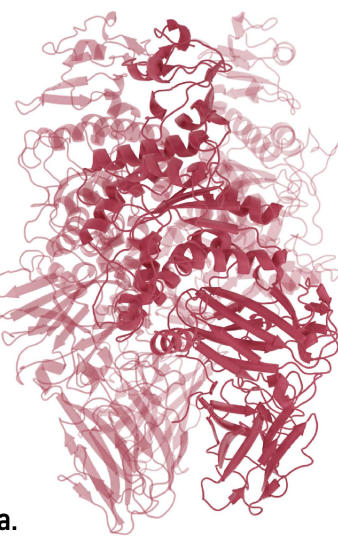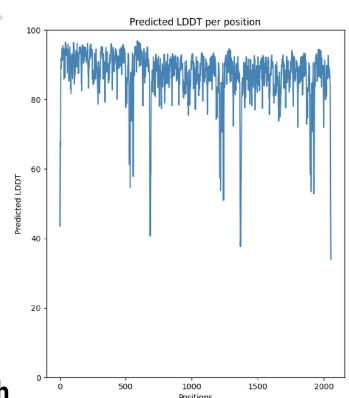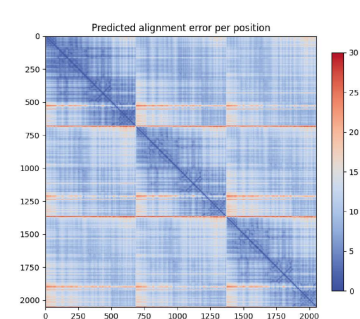

a.

b.

c.

Name: **Penshu1\_RBP**

Subtype target serogroup: **4s**

Genus: *Kayfunavirus*

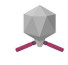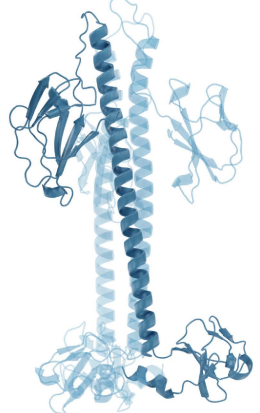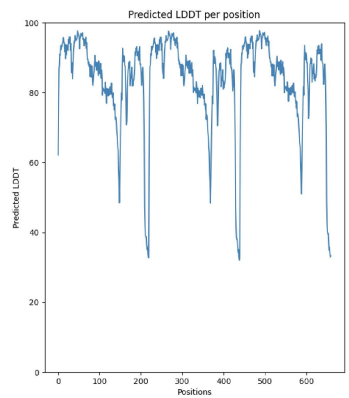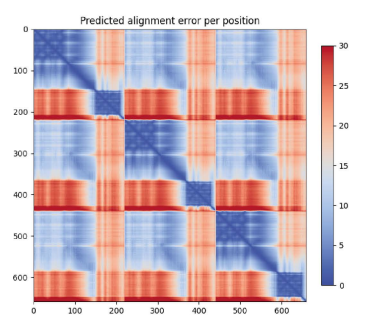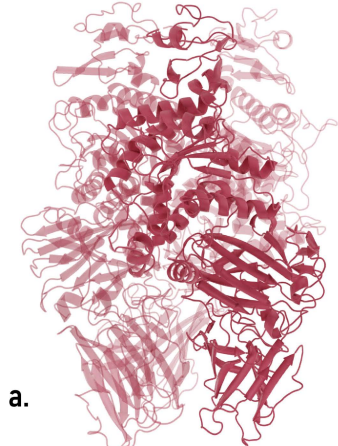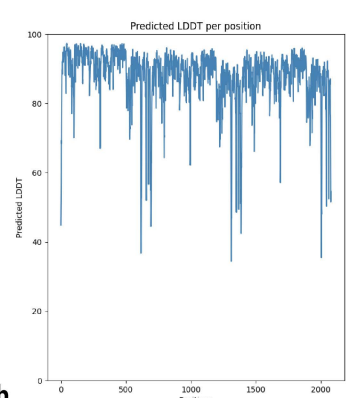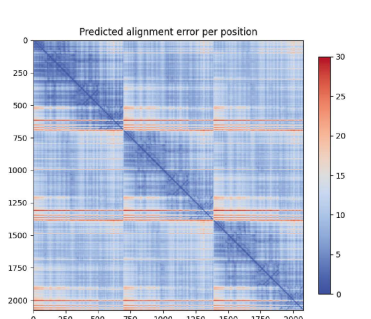

a.

b.

c.

Name: **Schulenburg\_RBP**

Subtype target serogroup: **4s**

Genus: *Kagunavirus*

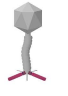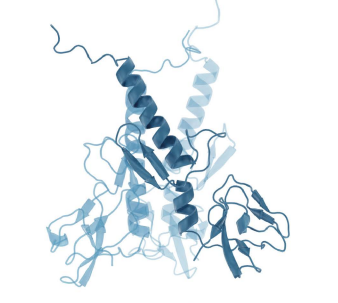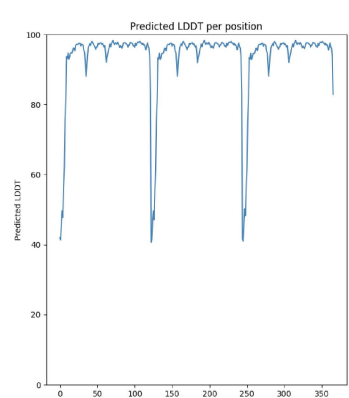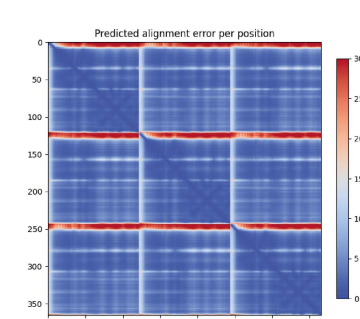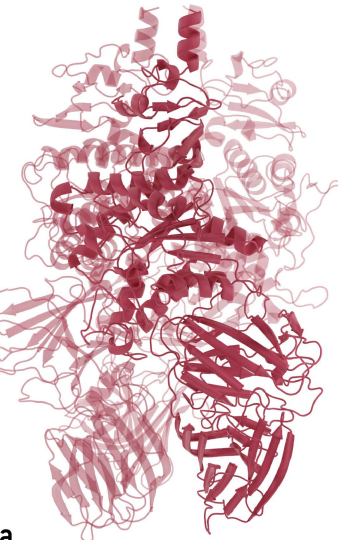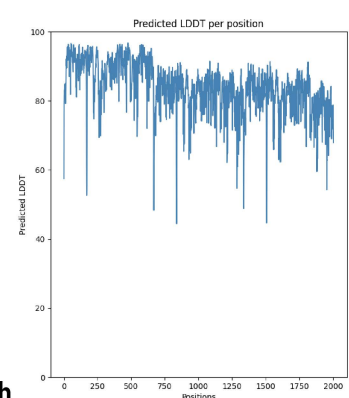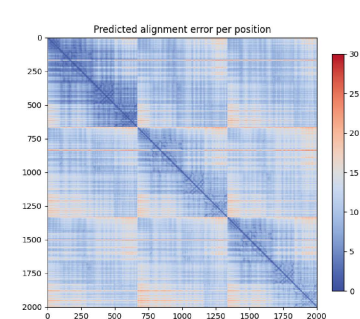

a.

b.

c.

Name: **STEC711\_Prophage\_RBP**

Subtype target serogroup: **4s**

Genus: *Lederbergvirus*

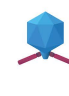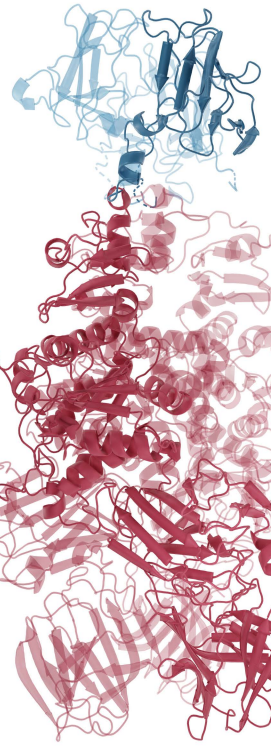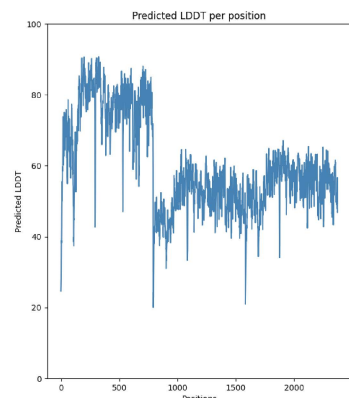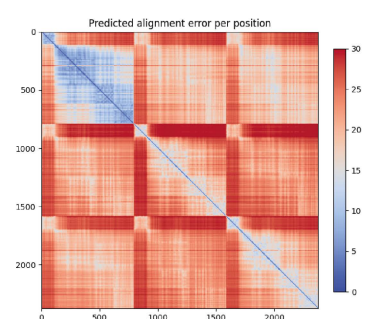

a.

b.

c.



Name: **K1H\_RBP**  
Subtype target serogroup: **K1**  
Genus: *Kagunavirus*

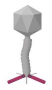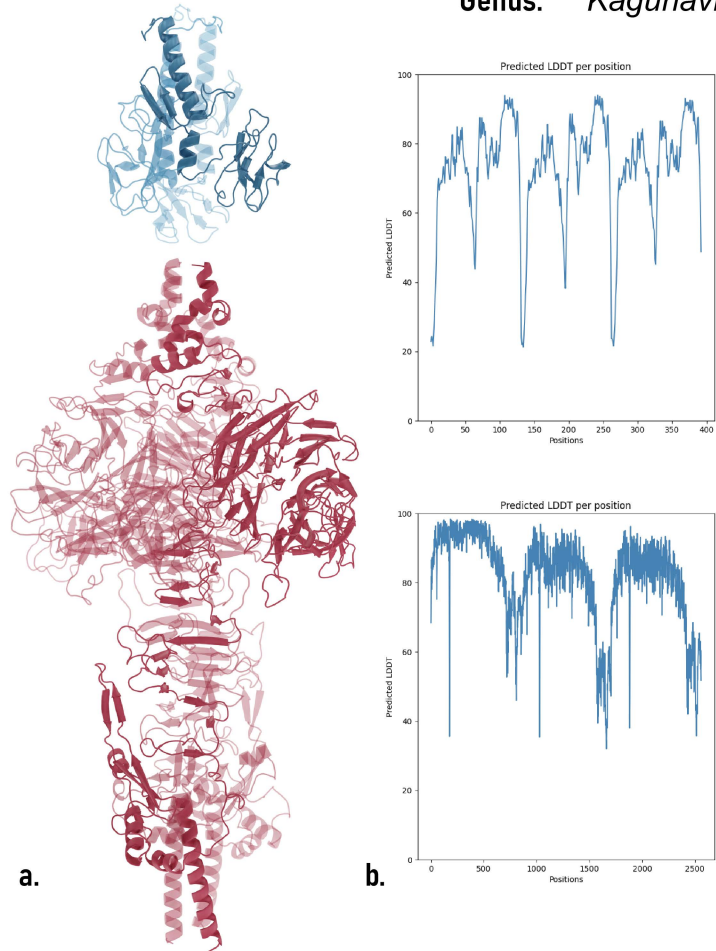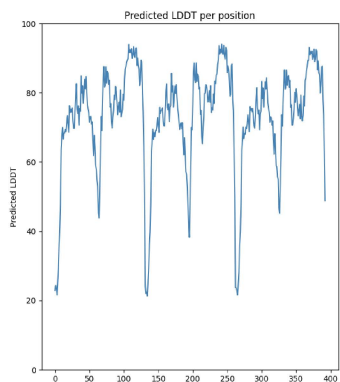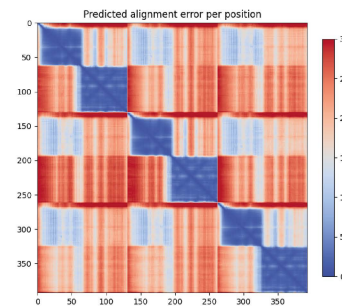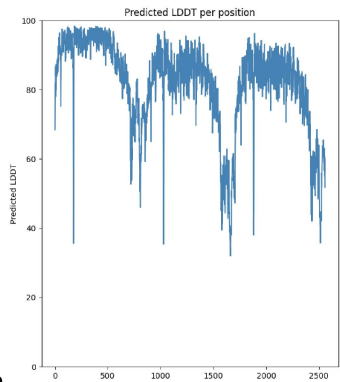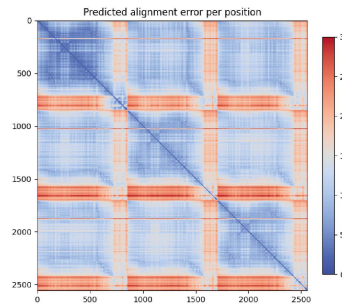

Name: **K1F\_RBP**  
Subtype target serogroup: **K1**  
Genus: *Kayfunavirus*

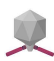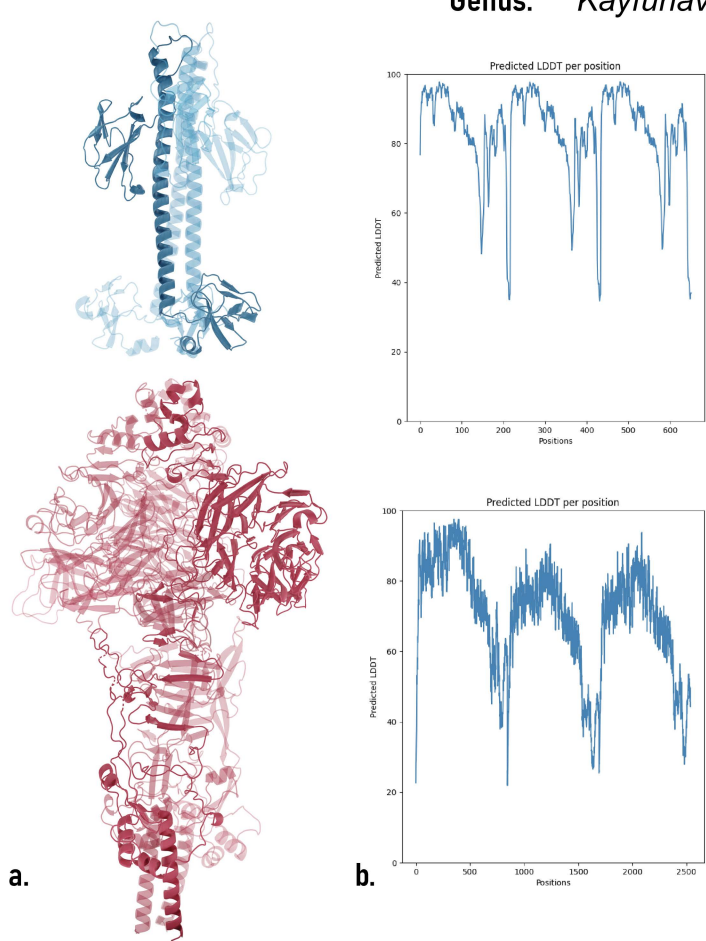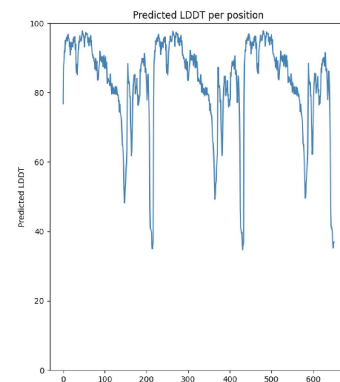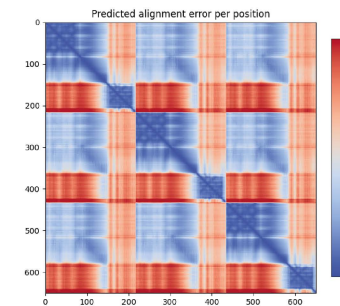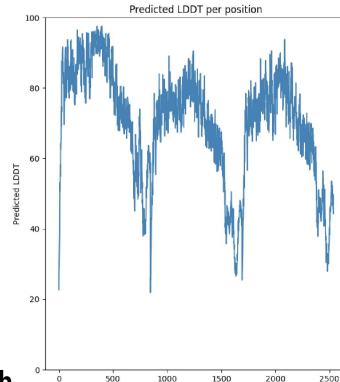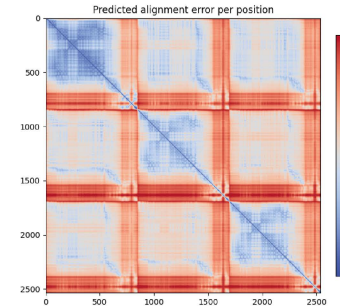

Name: **Phi92\_RBP**  
Subtype target serogroup: **K1**  
Genus: *Justusliebigvirus*

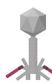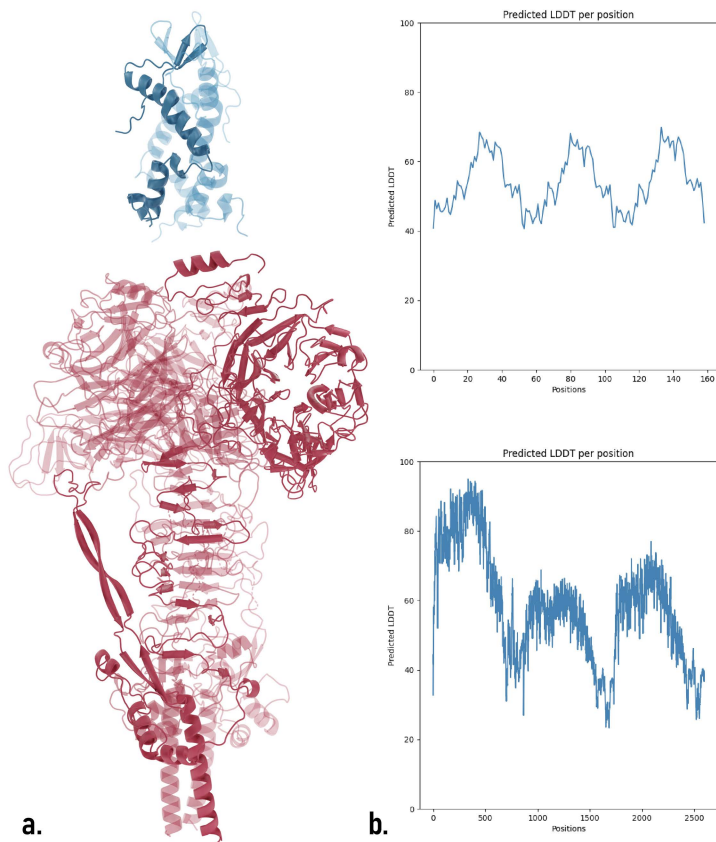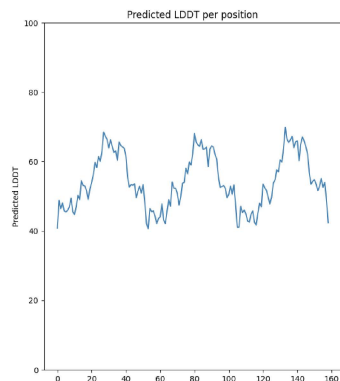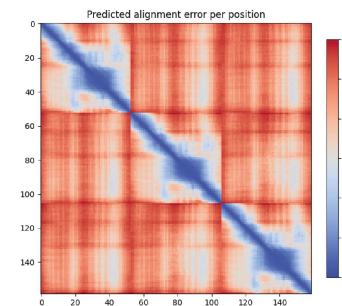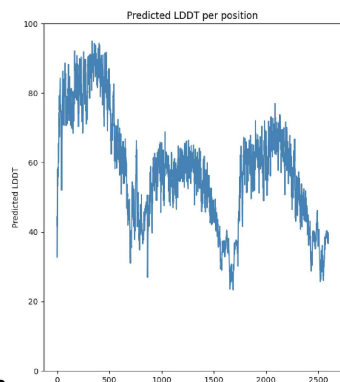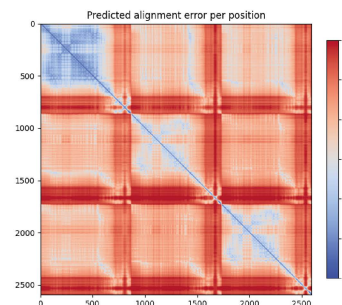

Name: **Phiv205-1\_RBP**  
Subtype target serogroup: **K1**  
Genus: *Lederbergvirus*

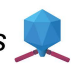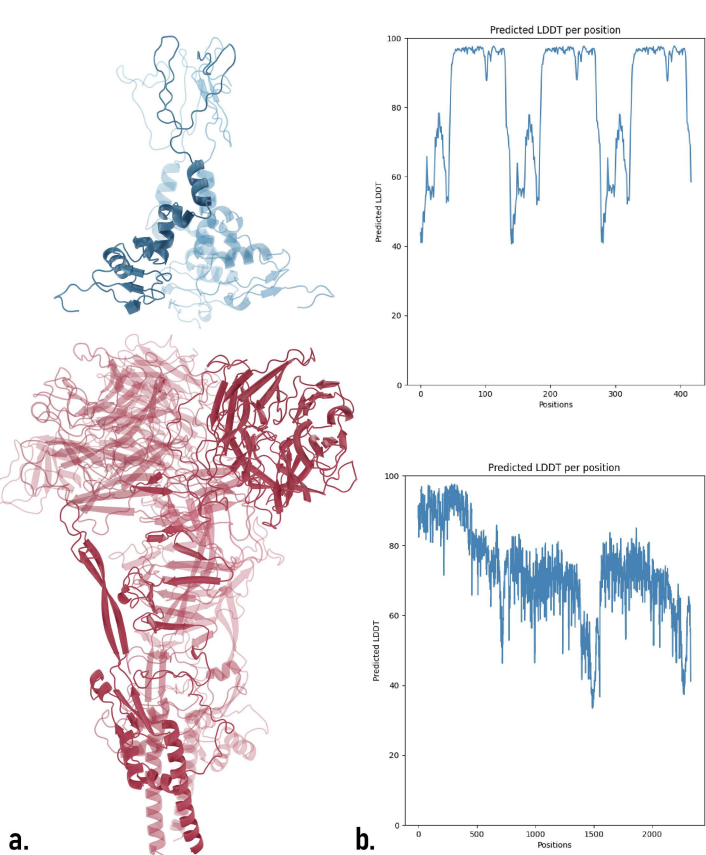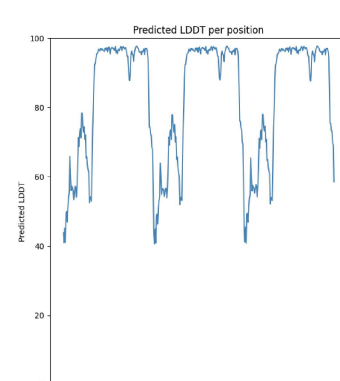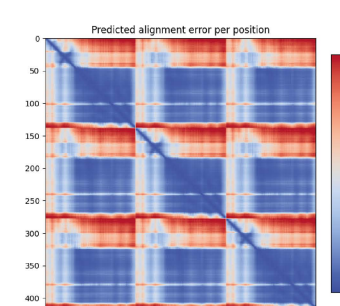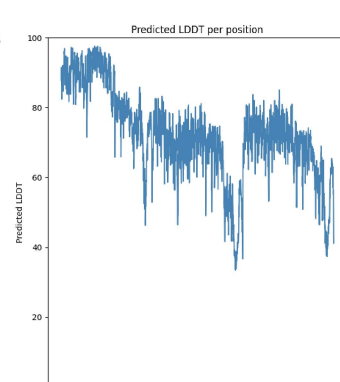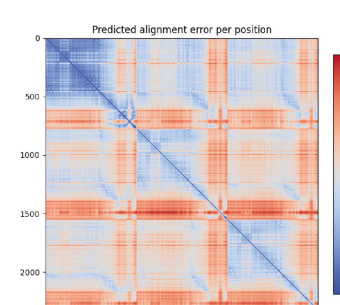

Name: **ZX5\_RBP**  
Subtype target serogroup: **K1**  
Genus: *Uetakevirus*

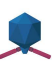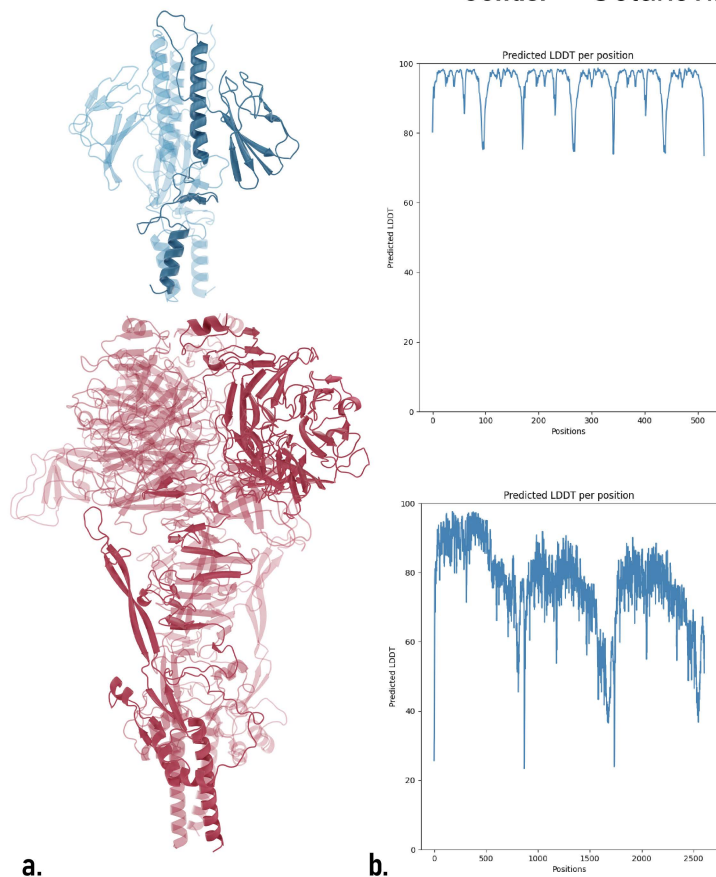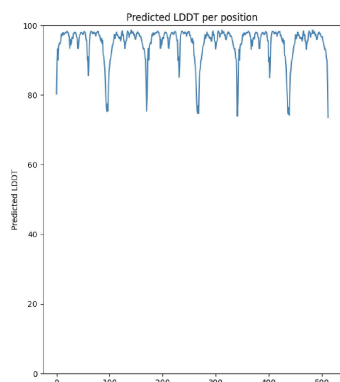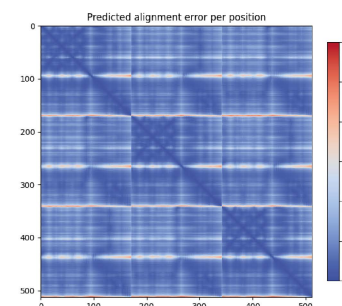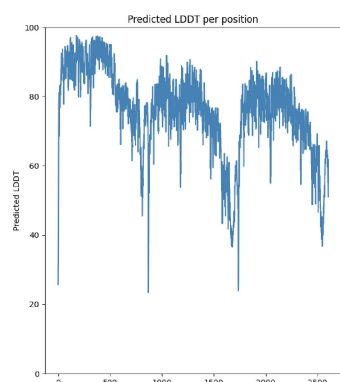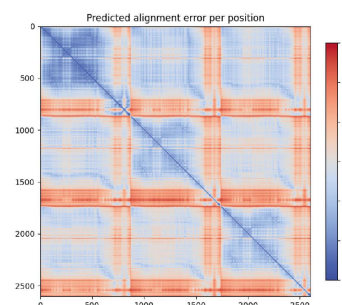



**Additional file 4: Figure S4: Predicted quaternary structures of the phage RBPs using AlphaFold2.**

RBPs are clustered according to RBP subtype (a) Anchor domain shown in blue and RBD indicated in red, using different shades for each of the three monomers. An asterisk was used to indicate when quaternary structure predictions of RBP domains resulted in erroneous structures. (b) AlphaFold2 predicted LDDT per amino acid position; the upper graph represents the anchor domain and the lower graph the RBD when the structure was predicted separately. (c) AlphaFold2 predicted alignment error per amino acid position; the upper graph represents the anchor domain and the lower graph the RBD when the structure was predicted separately. When quaternary structure predictions of domains were unsuccessful, the tertiary structure was displayed instead.
